# Supplementary material for: Perturbation of Parentally Biased Gene Expression during Interspecific Hybridization
Source: PLoS One. 2015 Feb 26;10(2):e0117293. doi: 10.1371/journal.pone.0117293 (PMC4342222; doi:10.1371/journal.pone.0117293)
Supplement: S1 File — C24 SNP set generated by aligning sequenced 3 DAP C24 to TAIR10. (DAT) [file pone.0117293.s011.dat]

Gene Model	Locus	Position	Reference	SNPBase-C24	TotalCov-C24	%SNPC24
AT1G01040.1	AT1G01040	4345	C	A	8	100
AT1G01040.1	AT1G01040	5312	C	T	17	100
AT1G01040.2	AT1G01040	4048	C	T	10	100
AT1G01040.2	AT1G01040	4078	C	A	12	100
AT1G01040.2	AT1G01040	5045	C	T	9	100
AT1G01050.1	AT1G01050	923	A	G	21	95.23
AT1G01080.1	AT1G01080	456	G	A	17	100
AT1G01080.2	AT1G01080	456	G	A	22	100
AT1G01090.1	AT1G01090	180	T	A	70	100
AT1G01090.1	AT1G01090	207	A	G	68	100
AT1G01090.1	AT1G01090	1053	T	C	99	100
AT1G01090.1	AT1G01090	1535	C	T	57	100
AT1G01120.1	AT1G01120	1482	T	G	75	100
AT1G01130.1	AT1G01130	53	C	T	16	100
AT1G01130.1	AT1G01130	55	C	A	16	100
AT1G01130.1	AT1G01130	192	T	G	8	100
AT1G01140.1	AT1G01140	940	A	G	21	100
AT1G01140.1	AT1G01140	1539	T	C	10	100
AT1G01140.1	AT1G01140	1543	C	G	10	100
AT1G01140.1	AT1G01140	1544	A	C	10	100
AT1G01140.2	AT1G01140	946	A	G	11	100
AT1G01140.2	AT1G01140	1545	T	C	7	100
AT1G01140.2	AT1G01140	1549	C	G	6	100
AT1G01140.2	AT1G01140	1550	A	C	6	100
AT1G01140.3	AT1G01140	940	A	G	10	100
AT1G01140.3	AT1G01140	1551	T	C	11	100
AT1G01140.3	AT1G01140	1555	C	G	11	100
AT1G01140.3	AT1G01140	1556	A	C	11	100
AT1G01160.1	AT1G01160	183	T	G	13	100
AT1G01160.1	AT1G01160	508	C	G	43	100
AT1G01160.1	AT1G01160	721	C	T	50	100
AT1G01160.1	AT1G01160	884	G	A	48	100
AT1G01160.1	AT1G01160	1010	G	A	11	100
AT1G01160.2	AT1G01160	165	T	G	18	100
AT1G01160.2	AT1G01160	592	C	G	37	100
AT1G01160.2	AT1G01160	805	C	T	49	100
AT1G01160.2	AT1G01160	968	G	A	39	100
AT1G01160.2	AT1G01160	1094	G	A	12	100
AT1G01170.1	AT1G01170	234	G	A	51	98.03
AT1G01170.1	AT1G01170	284	C	T	37	100
AT1G01170.1	AT1G01170	385	C	T	31	100
AT1G01170.2	AT1G01170	222	G	A	39	100
AT1G01170.2	AT1G01170	272	C	T	33	100
AT1G01170.2	AT1G01170	373	C	T	33	100
AT1G01180.1	AT1G01180	263	T	A	8	100
AT1G01180.1	AT1G01180	317	T	C	8	100
AT1G01180.1	AT1G01180	404	T	C	8	100
AT1G01180.1	AT1G01180	507	G	A	5	100
AT1G01180.1	AT1G01180	524	A	C	6	100
AT1G01210.1	AT1G01210	125	G	T	11	100
AT1G01210.1	AT1G01210	277	C	T	40	100
AT1G01210.1	AT1G01210	304	G	A	48	100
AT1G01220.1	AT1G01220	3106	A	G	38	100
AT1G01225.1	AT1G01225	144	A	C	8	100
AT1G01225.1	AT1G01225	146	A	C	9	100
AT1G01225.1	AT1G01225	347	C	T	16	100
AT1G01225.1	AT1G01225	966	G	A	12	100
AT1G01230.1	AT1G01230	593	C	T	78	100
AT1G01230.1	AT1G01230	769	C	A	39	100
AT1G01250.1	AT1G01250	500	G	C	5	100
AT1G01260.1	AT1G01260	1394	T	C	10	100
AT1G01260.2	AT1G01260	1268	T	C	13	100
AT1G01260.3	AT1G01260	1405	T	C	8	100
AT1G01290.1	AT1G01290	178	T	C	6	100
AT1G01290.1	AT1G01290	267	A	C	19	100
AT1G01290.1	AT1G01290	294	A	G	26	100
AT1G01290.1	AT1G01290	330	A	C	28	100
AT1G01290.1	AT1G01290	377	G	T	20	100
AT1G01290.1	AT1G01290	439	C	T	30	100
AT1G01290.1	AT1G01290	529	A	C	30	100
AT1G01290.1	AT1G01290	535	G	C	30	100
AT1G01290.2	AT1G01290	178	T	C	6	100
AT1G01290.2	AT1G01290	267	A	C	23	100
AT1G01290.2	AT1G01290	294	A	G	29	100
AT1G01290.2	AT1G01290	330	A	C	28	100
AT1G01290.2	AT1G01290	377	G	T	21	100
AT1G01290.2	AT1G01290	439	C	T	26	96.15
AT1G01290.2	AT1G01290	529	A	C	30	100
AT1G01290.2	AT1G01290	535	G	C	29	100
AT1G01300.1	AT1G01300	62	A	C	7	100
AT1G01300.1	AT1G01300	386	C	T	30	96.66
AT1G01300.1	AT1G01300	387	G	C	29	100
AT1G01300.1	AT1G01300	389	C	A	30	100
AT1G01300.1	AT1G01300	433	A	G	42	100
AT1G01300.1	AT1G01300	437	T	A	40	100
AT1G01300.1	AT1G01300	650	C	T	39	100
AT1G01300.1	AT1G01300	845	G	A	47	100
AT1G01300.1	AT1G01300	938	T	A	40	100
AT1G01300.1	AT1G01300	1013	T	C	49	97.95
AT1G01300.1	AT1G01300	1052	C	T	47	100
AT1G01300.1	AT1G01300	1055	A	T	47	100
AT1G01300.1	AT1G01300	1097	A	G	57	100
AT1G01300.1	AT1G01300	1250	A	C	53	100
AT1G01320.1	AT1G01320	210	T	C	5	100
AT1G01320.1	AT1G01320	408	G	A	9	100
AT1G01320.1	AT1G01320	476	C	T	9	100
AT1G01320.2	AT1G01320	248	C	G	5	100
AT1G01320.2	AT1G01320	251	G	C	5	100
AT1G01320.2	AT1G01320	415	G	A	13	100
AT1G01320.2	AT1G01320	483	C	T	11	100
AT1G01320.2	AT1G01320	676	A	G	5	100
AT1G01320.2	AT1G01320	4699	T	C	5	100
AT1G01350.1	AT1G01350	335	C	G	25	100
AT1G01350.1	AT1G01350	407	C	T	27	100
AT1G01360.1	AT1G01360	187	G	A	11	100
AT1G01370.1	AT1G01370	316	C	A	6	100
AT1G01370.2	AT1G01370	252	C	A	11	100
AT1G01420.1	AT1G01420	28	G	T	16	100
AT1G01420.1	AT1G01420	91	C	G	52	100
AT1G01420.1	AT1G01420	333	G	C	44	100
AT1G01420.1	AT1G01420	334	G	T	43	97.67
AT1G01420.1	AT1G01420	386	A	T	42	100
AT1G01420.1	AT1G01420	417	A	G	43	100
AT1G01420.1	AT1G01420	570	A	C	53	100
AT1G01420.1	AT1G01420	1333	T	G	66	100
AT1G01430.1	AT1G01430	16	T	C	6	100
AT1G01430.1	AT1G01430	351	T	C	65	100
AT1G01430.1	AT1G01430	541	G	A	64	100
AT1G01430.1	AT1G01430	1036	A	G	84	100
AT1G01440.1	AT1G01440	134	G	T	5	100
AT1G01440.1	AT1G01440	1018	T	G	12	100
AT1G01440.1	AT1G01440	1136	C	T	13	100
AT1G01440.1	AT1G01440	2136	C	T	19	100
AT1G01490.1	AT1G01490	320	T	C	5	100
AT1G01490.1	AT1G01490	328	C	T	5	100
AT1G01500.1	AT1G01500	101	A	G	8	100
AT1G01500.1	AT1G01500	651	T	C	29	100
AT1G01500.1	AT1G01500	1399	A	G	20	100
AT1G01510.1	AT1G01510	1011	A	G	40	100
AT1G01530.1	AT1G01530	118	G	C	5	100
AT1G01530.1	AT1G01530	236	G	A	15	100
AT1G01530.1	AT1G01530	274	G	A	17	100
AT1G01540.1	AT1G01540	588	A	G	10	100
AT1G01540.1	AT1G01540	780	A	T	20	100
AT1G01540.1	AT1G01540	822	G	C	19	100
AT1G01540.1	AT1G01540	861	C	T	17	100
AT1G01540.1	AT1G01540	903	T	C	16	100
AT1G01540.1	AT1G01540	1143	A	G	29	100
AT1G01540.1	AT1G01540	1386	T	A	20	100
AT1G01540.1	AT1G01540	1443	T	C	31	100
AT1G01540.1	AT1G01540	1602	C	G	14	100
AT1G01540.1	AT1G01540	1620	G	C	17	100
AT1G01540.1	AT1G01540	1649	A	T	17	100
AT1G01540.1	AT1G01540	1662	G	C	23	100
AT1G01540.1	AT1G01540	1822	T	C	29	100
AT1G01540.1	AT1G01540	1891	G	C	5	100
AT1G01540.2	AT1G01540	620	A	G	7	100
AT1G01540.2	AT1G01540	812	A	T	18	100
AT1G01540.2	AT1G01540	854	G	C	17	100
AT1G01540.2	AT1G01540	893	C	T	22	100
AT1G01540.2	AT1G01540	935	T	C	18	100
AT1G01540.2	AT1G01540	1175	A	G	20	100
AT1G01540.2	AT1G01540	1349	T	A	39	100
AT1G01540.2	AT1G01540	1406	T	C	39	100
AT1G01540.2	AT1G01540	1565	C	G	21	100
AT1G01540.2	AT1G01540	1583	G	C	19	100
AT1G01540.2	AT1G01540	1612	A	T	26	96.15
AT1G01540.2	AT1G01540	1625	G	C	30	100
AT1G01540.2	AT1G01540	1785	T	C	34	100
AT1G01540.2	AT1G01540	1854	G	C	26	100
AT1G01540.2	AT1G01540	1890	G	A	13	100
AT1G01550.1	AT1G01550	50	T	A	8	100
AT1G01550.1	AT1G01550	267	A	G	66	100
AT1G01550.1	AT1G01550	558	T	A	91	100
AT1G01550.1	AT1G01550	564	T	A	87	100
AT1G01550.1	AT1G01550	771	C	T	90	100
AT1G01550.1	AT1G01550	801	T	C	80	100
AT1G01550.1	AT1G01550	829	T	G	85	100
AT1G01550.1	AT1G01550	915	A	C	98	100
AT1G01550.1	AT1G01550	925	G	A	96	100
AT1G01550.1	AT1G01550	994	C	T	87	100
AT1G01550.1	AT1G01550	1007	C	A	86	100
AT1G01550.1	AT1G01550	1047	A	G	71	98.59
AT1G01550.1	AT1G01550	1057	C	T	68	100
AT1G01550.1	AT1G01550	1068	G	A	71	98.59
AT1G01550.1	AT1G01550	1104	T	C	76	100
AT1G01550.1	AT1G01550	1211	A	G	45	100
AT1G01550.1	AT1G01550	1220	C	G	44	100
AT1G01550.1	AT1G01550	1221	G	T	43	100
AT1G01550.1	AT1G01550	1271	A	T	47	100
AT1G01550.1	AT1G01550	1275	T	G	42	100
AT1G01550.1	AT1G01550	1290	T	A	54	100
AT1G01550.1	AT1G01550	1335	T	G	61	100
AT1G01550.1	AT1G01550	1439	T	C	5	100
AT1G01550.2	AT1G01550	47	G	A	7	100
AT1G01550.2	AT1G01550	241	A	G	64	100
AT1G01550.2	AT1G01550	532	T	A	91	98.9
AT1G01550.2	AT1G01550	538	T	A	87	100
AT1G01550.2	AT1G01550	745	C	T	86	100
AT1G01550.2	AT1G01550	775	T	C	82	98.78
AT1G01550.2	AT1G01550	803	T	G	86	100
AT1G01550.2	AT1G01550	889	A	C	101	100
AT1G01550.2	AT1G01550	899	G	A	98	100
AT1G01550.2	AT1G01550	968	C	T	89	100
AT1G01550.2	AT1G01550	981	C	A	85	100
AT1G01550.2	AT1G01550	1021	A	G	69	100
AT1G01550.2	AT1G01550	1031	C	T	72	100
AT1G01550.2	AT1G01550	1042	G	A	74	98.64
AT1G01550.2	AT1G01550	1078	T	C	82	100
AT1G01550.2	AT1G01550	1185	A	G	49	97.95
AT1G01550.2	AT1G01550	1194	C	G	55	100
AT1G01550.2	AT1G01550	1195	G	T	54	100
AT1G01550.2	AT1G01550	1245	A	T	53	100
AT1G01550.2	AT1G01550	1249	T	G	50	100
AT1G01550.2	AT1G01550	1264	T	A	52	100
AT1G01550.2	AT1G01550	1309	T	G	58	100
AT1G01550.2	AT1G01550	1413	T	C	7	100
AT1G01570.1	AT1G01570	1270	T	A	8	100
AT1G01600.1	AT1G01600	72	T	A	15	100
AT1G01600.1	AT1G01600	105	C	T	11	100
AT1G01600.1	AT1G01600	127	A	T	18	100
AT1G01600.1	AT1G01600	157	A	T	17	100
AT1G01600.1	AT1G01600	174	T	A	26	100
AT1G01600.1	AT1G01600	175	A	G	27	100
AT1G01600.1	AT1G01600	419	G	A	57	98.24
AT1G01600.1	AT1G01600	1004	G	A	74	100
AT1G01600.1	AT1G01600	1112	G	A	51	98.03
AT1G01600.1	AT1G01600	1115	T	C	52	100
AT1G01600.1	AT1G01600	1211	C	T	65	100
AT1G01600.1	AT1G01600	1633	C	T	45	100
AT1G01600.1	AT1G01600	1634	A	G	46	100
AT1G01600.1	AT1G01600	2004	A	G	24	100
AT1G01610.1	AT1G01610	463	A	G	102	100
AT1G01610.1	AT1G01610	877	C	T	80	100
AT1G01610.1	AT1G01610	988	A	C	100	100
AT1G01610.1	AT1G01610	1324	G	A	108	98.14
AT1G01610.1	AT1G01610	1582	C	T	113	100
AT1G01620.1	AT1G01620	180	G	A	12	100
AT1G01620.1	AT1G01620	528	T	C	12	100
AT1G01620.2	AT1G01620	499	T	C	13	100
AT1G01630.1	AT1G01630	945	C	A	54	100
AT1G01630.1	AT1G01630	1054	C	T	33	100
AT1G01630.1	AT1G01630	1067	C	G	21	100
AT1G01640.1	AT1G01640	331	T	A	15	100
AT1G01640.1	AT1G01640	649	A	C	31	100
AT1G01640.1	AT1G01640	834	A	G	16	100
AT1G01640.2	AT1G01640	296	T	A	24	100
AT1G01640.2	AT1G01640	614	A	C	21	100
AT1G01640.2	AT1G01640	799	A	G	17	100
AT1G01650.1	AT1G01650	1887	A	T	23	100
AT1G01650.2	AT1G01650	1967	A	T	22	100
AT1G01660.1	AT1G01660	1219	G	A	10	100
AT1G01670.1	AT1G01670	795	G	A	15	100
AT1G01670.1	AT1G01670	842	C	T	19	100
AT1G01670.1	AT1G01670	887	G	A	10	100
AT1G01670.1	AT1G01670	950	T	A	12	100
AT1G01670.1	AT1G01670	958	A	G	10	100
AT1G01670.1	AT1G01670	991	G	A	6	100
AT1G01670.1	AT1G01670	1088	T	A	9	100
AT1G01670.1	AT1G01670	1242	G	A	9	100
AT1G01690.1	AT1G01690	291	A	G	15	100
AT1G01690.1	AT1G01690	410	C	T	15	100
AT1G01690.1	AT1G01690	429	G	A	18	100
AT1G01690.1	AT1G01690	435	T	A	18	100
AT1G01690.1	AT1G01690	554	A	G	20	100
AT1G01690.1	AT1G01690	712	T	C	16	100
AT1G01690.1	AT1G01690	854	T	A	15	100
AT1G01690.1	AT1G01690	860	C	T	16	100
AT1G01690.1	AT1G01690	895	G	A	16	100
AT1G01690.1	AT1G01690	923	T	A	23	100
AT1G01690.1	AT1G01690	1107	T	C	19	100
AT1G01690.1	AT1G01690	1130	C	A	19	100
AT1G01690.1	AT1G01690	1315	G	T	38	100
AT1G01690.1	AT1G01690	1316	A	T	38	100
AT1G01690.1	AT1G01690	1473	G	T	22	100
AT1G01690.1	AT1G01690	1577	T	A	14	100
AT1G01690.1	AT1G01690	1579	T	C	13	100
AT1G01710.1	AT1G01710	1244	G	C	58	100
AT1G01710.1	AT1G01710	1390	G	T	28	100
AT1G01710.1	AT1G01710	1488	G	T	29	100
AT1G01710.1	AT1G01710	1536	G	T	38	100
AT1G01710.1	AT1G01710	2115	C	G	25	100
AT1G01710.1	AT1G01710	2117	A	T	25	100
AT1G01710.1	AT1G01710	2172	C	T	38	100
AT1G01710.1	AT1G01710	2214	G	T	46	100
AT1G01710.1	AT1G01710	2278	A	G	39	100
AT1G01710.1	AT1G01710	2291	G	A	34	100
AT1G01720.1	AT1G01720	780	T	G	41	100
AT1G01720.1	AT1G01720	1139	C	G	45	100
AT1G01720.1	AT1G01720	1192	G	A	42	100
AT1G01725.1	AT1G01725	131	C	T	41	100
AT1G01725.1	AT1G01725	431	G	T	14	100
AT1G01730.1	AT1G01730	75	G	A	5	100
AT1G01730.1	AT1G01730	175	T	G	37	100
AT1G01730.1	AT1G01730	189	A	C	36	100
AT1G01730.1	AT1G01730	363	C	T	57	100
AT1G01730.1	AT1G01730	372	T	C	52	100
AT1G01730.1	AT1G01730	722	G	A	64	100
AT1G01740.2	AT1G01740	296	A	T	7	100
AT1G01740.2	AT1G01740	1155	C	T	8	100
AT1G01760.1	AT1G01760	713	A	G	6	100
AT1G01760.1	AT1G01760	1134	A	C	6	100
AT1G01760.1	AT1G01760	1182	G	A	7	100
AT1G01770.1	AT1G01770	528	C	A	6	100
AT1G01770.1	AT1G01770	531	C	A	7	100
AT1G01770.1	AT1G01770	938	T	C	5	100
AT1G01770.1	AT1G01770	1198	G	T	5	100
AT1G01770.1	AT1G01770	1275	T	C	7	100
AT1G01770.1	AT1G01770	1284	T	A	7	100
AT1G01770.1	AT1G01770	1383	T	C	9	100
AT1G01770.1	AT1G01770	1470	C	T	14	100
AT1G01770.1	AT1G01770	1564	C	T	18	100
AT1G01770.1	AT1G01770	1622	C	A	23	100
AT1G01770.1	AT1G01770	1629	C	T	24	100
AT1G01770.1	AT1G01770	1710	A	G	26	100
AT1G01770.1	AT1G01770	1749	C	T	25	100
AT1G01770.1	AT1G01770	1761	G	A	17	100
AT1G01770.1	AT1G01770	1777	G	A	19	100
AT1G01770.1	AT1G01770	1779	C	T	20	100
AT1G01770.1	AT1G01770	2130	C	T	21	100
AT1G01770.1	AT1G01770	2242	T	A	17	100
AT1G01770.1	AT1G01770	2310	G	T	9	100
AT1G01780.1	AT1G01780	68	T	A	7	100
AT1G01780.1	AT1G01780	458	A	C	19	100
AT1G01780.1	AT1G01780	594	T	C	17	100
AT1G01780.1	AT1G01780	881	T	A	5	100
AT1G01790.1	AT1G01790	3586	T	G	12	100
AT1G01800.1	AT1G01800	360	T	C	12	100
AT1G01800.2	AT1G01800	364	T	C	8	100
AT1G01810.1	AT1G01810	166	T	C	8	100
AT1G01830.1	AT1G01830	311	C	T	10	100
AT1G01830.1	AT1G01830	366	G	T	13	100
AT1G01830.1	AT1G01830	619	G	A	12	100
AT1G01830.1	AT1G01830	620	G	T	12	100
AT1G01830.1	AT1G01830	1203	A	G	23	100
AT1G01830.1	AT1G01830	1204	A	G	23	100
AT1G01830.1	AT1G01830	2029	T	A	12	100
AT1G01830.2	AT1G01830	342	C	T	11	100
AT1G01830.2	AT1G01830	397	G	T	20	100
AT1G01830.2	AT1G01830	650	G	A	20	100
AT1G01830.2	AT1G01830	651	G	T	20	100
AT1G01830.2	AT1G01830	1234	A	G	23	100
AT1G01830.2	AT1G01830	1235	A	G	21	100
AT1G01830.2	AT1G01830	2060	T	A	14	100
AT1G01830.3	AT1G01830	641	C	T	11	100
AT1G01830.3	AT1G01830	696	G	T	13	100
AT1G01830.3	AT1G01830	949	G	A	15	100
AT1G01830.3	AT1G01830	950	G	T	15	100
AT1G01830.3	AT1G01830	1533	A	G	18	100
AT1G01830.3	AT1G01830	1534	A	G	19	100
AT1G01830.3	AT1G01830	2359	T	A	13	100
AT1G01840.1	AT1G01840	338	A	G	13	100
AT1G01840.1	AT1G01840	693	C	A	12	100
AT1G01860.1	AT1G01860	561	T	C	18	100
AT1G01880.1	AT1G01880	1863	C	T	12	100
AT1G01880.2	AT1G01880	1860	C	T	8	100
AT1G01910.1	AT1G01910	635	C	T	26	100
AT1G01910.1	AT1G01910	648	T	C	27	100
AT1G01910.2	AT1G01910	635	C	T	30	100
AT1G01910.2	AT1G01910	648	T	C	31	100
AT1G01910.2	AT1G01910	1347	G	C	26	100
AT1G01910.3	AT1G01910	635	C	T	20	100
AT1G01910.3	AT1G01910	648	T	C	21	100
AT1G01910.3	AT1G01910	1348	G	C	23	100
AT1G01910.4	AT1G01910	635	C	T	20	100
AT1G01910.4	AT1G01910	648	T	C	23	100
AT1G01910.4	AT1G01910	1233	G	C	21	100
AT1G01910.4	AT1G01910	1459	A	G	12	100
AT1G01910.5	AT1G01910	510	C	T	20	100
AT1G01910.5	AT1G01910	523	T	C	18	100
AT1G01910.5	AT1G01910	1222	G	C	11	100
AT1G01920.1	AT1G01920	623	A	T	6	100
AT1G01920.1	AT1G01920	1302	C	A	15	100
AT1G01920.1	AT1G01920	1487	T	C	28	96.42
AT1G01920.2	AT1G01920	682	A	T	13	100
AT1G01920.2	AT1G01920	727	C	A	14	100
AT1G01920.2	AT1G01920	1286	C	A	7	100
AT1G01920.2	AT1G01920	1471	T	C	24	100
AT1G01930.1	AT1G01930	381	A	G	18	100
AT1G01930.1	AT1G01930	849	C	T	41	100
AT1G01930.1	AT1G01930	965	G	T	22	100
AT1G01930.1	AT1G01930	1278	T	A	19	100
AT1G01930.1	AT1G01930	1647	C	A	29	100
AT1G01930.1	AT1G01930	1872	C	A	28	96.42
AT1G01930.1	AT1G01930	1873	A	T	27	100
AT1G01950.1	AT1G01950	929	T	G	9	100
AT1G01950.1	AT1G01950	930	T	A	9	100
AT1G01950.1	AT1G01950	1757	A	T	14	100
AT1G01950.2	AT1G01950	929	T	G	8	100
AT1G01950.2	AT1G01950	930	T	A	8	100
AT1G01950.2	AT1G01950	1757	A	T	10	100
AT1G01950.3	AT1G01950	929	T	G	9	100
AT1G01950.3	AT1G01950	930	T	A	9	100
AT1G01950.3	AT1G01950	1757	A	T	19	100
AT1G01960.1	AT1G01960	1410	C	T	17	100
AT1G01960.1	AT1G01960	1789	T	A	13	100
AT1G01960.1	AT1G01960	2289	C	T	23	100
AT1G01960.1	AT1G01960	2976	G	C	24	100
AT1G01960.1	AT1G01960	4263	A	G	45	100
AT1G01960.1	AT1G01960	4422	C	T	65	100
AT1G01960.1	AT1G01960	4814	T	C	77	100
AT1G01960.1	AT1G01960	4906	G	A	67	100
AT1G01970.1	AT1G01970	454	T	G	9	100
AT1G01970.1	AT1G01970	1504	G	C	35	100
AT1G01970.1	AT1G01970	1594	C	G	21	100
AT1G01970.1	AT1G01970	1597	A	T	22	100
AT1G01990.1	AT1G01990	631	G	A	43	100
AT1G01990.1	AT1G01990	893	C	T	64	100
AT1G01990.1	AT1G01990	993	T	A	45	100
AT1G01990.1	AT1G01990	1048	G	A	41	100
AT1G01990.1	AT1G01990	1086	C	T	17	100
AT1G02000.1	AT1G02000	197	C	A	17	100
AT1G02000.1	AT1G02000	205	T	C	20	100
AT1G02000.1	AT1G02000	312	G	C	16	100
AT1G02010.1	AT1G02010	94	A	G	8	100
AT1G02020.1	AT1G02020	1642	T	G	8	100
AT1G02020.1	AT1G02020	1657	T	C	5	100
AT1G02020.1	AT1G02020	1769	A	G	5	100
AT1G02020.1	AT1G02020	1789	A	T	6	100
AT1G02020.1	AT1G02020	1945	T	A	5	100
AT1G02020.2	AT1G02020	1642	T	G	7	100
AT1G02020.2	AT1G02020	1844	A	G	7	100
AT1G02020.2	AT1G02020	1864	A	T	9	100
AT1G02020.2	AT1G02020	1924	A	G	5	100
AT1G02020.2	AT1G02020	2041	G	C	6	100
AT1G02060.1	AT1G02060	945	G	T	15	100
AT1G02060.1	AT1G02060	1895	A	G	24	100
AT1G02065.1	AT1G02065	1223	C	T	6	100
AT1G02065.1	AT1G02065	1419	T	C	8	100
AT1G02080.1	AT1G02080	1488	T	C	10	100
AT1G02080.1	AT1G02080	4846	A	T	16	100
AT1G02080.1	AT1G02080	4890	T	G	14	100
AT1G02080.1	AT1G02080	5232	C	T	25	100
AT1G02080.1	AT1G02080	5238	T	C	23	100
AT1G02080.1	AT1G02080	5634	G	A	14	100
AT1G02080.1	AT1G02080	6024	T	C	23	100
AT1G02080.1	AT1G02080	6056	A	T	26	100
AT1G02080.2	AT1G02080	1519	T	C	6	100
AT1G02080.2	AT1G02080	4877	A	T	16	100
AT1G02080.2	AT1G02080	4921	T	G	19	100
AT1G02080.2	AT1G02080	5263	C	T	20	100
AT1G02080.2	AT1G02080	5269	T	C	20	100
AT1G02080.2	AT1G02080	5665	G	A	18	100
AT1G02080.2	AT1G02080	6055	T	C	23	100
AT1G02080.2	AT1G02080	6087	A	T	30	100
AT1G02090.1	AT1G02090	71	G	C	12	100
AT1G02090.1	AT1G02090	327	G	A	35	100
AT1G02090.1	AT1G02090	358	T	C	34	100
AT1G02090.2	AT1G02090	71	G	C	13	100
AT1G02090.2	AT1G02090	327	G	A	25	100
AT1G02090.2	AT1G02090	358	T	C	35	100
AT1G02090.3	AT1G02090	71	G	C	15	100
AT1G02090.3	AT1G02090	327	G	A	36	100
AT1G02090.3	AT1G02090	358	T	C	38	100
AT1G02090.3	AT1G02090	1121	A	T	5	100
AT1G02090.3	AT1G02090	1140	A	T	6	100
AT1G02100.1	AT1G02100	307	T	A	9	100
AT1G02100.1	AT1G02100	454	A	C	6	100
AT1G02100.1	AT1G02100	485	C	A	6	100
AT1G02100.1	AT1G02100	1077	T	G	15	100
AT1G02100.2	AT1G02100	298	T	A	5	100
AT1G02100.2	AT1G02100	1072	T	G	8	100
AT1G02100.3	AT1G02100	296	T	A	9	100
AT1G02100.3	AT1G02100	443	A	C	5	100
AT1G02100.3	AT1G02100	474	C	A	5	100
AT1G02100.3	AT1G02100	1066	T	G	9	100
AT1G02110.1	AT1G02110	69	A	G	5	100
AT1G02110.1	AT1G02110	841	C	T	8	100
AT1G02110.1	AT1G02110	1209	A	G	14	100
AT1G02110.1	AT1G02110	1893	A	G	46	100
AT1G02110.1	AT1G02110	2247	T	A	18	100
AT1G02120.1	AT1G02120	118	A	G	10	100
AT1G02140.1	AT1G02140	50	G	C	25	100
AT1G02145.1	AT1G02145	380	A	G	12	100
AT1G02145.1	AT1G02145	468	T	G	5	100
AT1G02145.1	AT1G02145	904	G	C	15	100
AT1G02145.1	AT1G02145	1258	G	A	11	100
AT1G02145.2	AT1G02145	461	A	G	11	100
AT1G02145.2	AT1G02145	549	T	G	12	100
AT1G02145.2	AT1G02145	976	G	A	17	100
AT1G02145.3	AT1G02145	392	A	G	12	100
AT1G02145.3	AT1G02145	480	T	G	7	100
AT1G02145.3	AT1G02145	916	G	C	9	100
AT1G02145.3	AT1G02145	1270	G	A	17	100
AT1G02145.4	AT1G02145	461	A	G	10	100
AT1G02145.4	AT1G02145	549	T	G	7	100
AT1G02145.4	AT1G02145	985	G	C	22	100
AT1G02145.4	AT1G02145	1339	G	A	10	100
AT1G02150.1	AT1G02150	1006	A	C	22	100
AT1G02150.1	AT1G02150	1720	A	C	47	100
AT1G02150.1	AT1G02150	1762	A	G	55	100
AT1G02170.1	AT1G02170	268	A	C	19	100
AT1G02170.1	AT1G02170	704	C	T	78	97.43
AT1G02170.1	AT1G02170	749	A	T	73	98.63
AT1G02170.1	AT1G02170	773	T	C	77	100
AT1G02170.1	AT1G02170	1253	A	T	20	100
AT1G02180.1	AT1G02180	130	T	A	7	100
AT1G02180.1	AT1G02180	169	T	C	20	100
AT1G02180.1	AT1G02180	529	G	A	26	100
AT1G02180.1	AT1G02180	532	G	A	24	100
AT1G02180.1	AT1G02180	533	T	A	25	100
AT1G02180.1	AT1G02180	539	G	A	30	100
AT1G02180.1	AT1G02180	603	A	G	50	100
AT1G02180.1	AT1G02180	623	C	A	54	100
AT1G02180.1	AT1G02180	640	A	C	64	100
AT1G02180.1	AT1G02180	647	C	T	68	100
AT1G02180.1	AT1G02180	817	T	G	39	100
AT1G02190.1	AT1G02190	1230	C	A	19	100
AT1G02190.1	AT1G02190	1978	C	T	23	100
AT1G02190.1	AT1G02190	2054	A	T	17	100
AT1G02190.1	AT1G02190	2119	A	T	5	100
AT1G02190.2	AT1G02190	1218	C	A	6	100
AT1G02190.2	AT1G02190	1966	C	T	31	96.77
AT1G02190.2	AT1G02190	2042	A	T	10	100
AT1G02205.1	AT1G02205	1974	T	C	10	100
AT1G02205.1	AT1G02205	2015	C	A	10	100
AT1G02205.1	AT1G02205	2097	A	T	15	100
AT1G02205.1	AT1G02205	2159	A	C	12	100
AT1G02205.1	AT1G02205	2286	T	A	14	100
AT1G02205.2	AT1G02205	1829	T	C	7	100
AT1G02205.2	AT1G02205	1952	A	T	14	100
AT1G02205.2	AT1G02205	2014	A	C	10	100
AT1G02205.2	AT1G02205	2141	T	A	6	100
AT1G02205.3	AT1G02205	1863	T	C	13	100
AT1G02205.3	AT1G02205	1904	C	A	12	100
AT1G02205.3	AT1G02205	1986	A	T	9	100
AT1G02205.3	AT1G02205	2048	A	C	7	100
AT1G02220.1	AT1G02220	901	T	A	5	100
AT1G02220.1	AT1G02220	907	G	A	5	100
AT1G02260.1	AT1G02260	200	T	A	9	100
AT1G02260.1	AT1G02260	537	G	A	21	100
AT1G02260.1	AT1G02260	1128	G	A	32	100
AT1G02260.1	AT1G02260	1220	C	G	19	100
AT1G02260.1	AT1G02260	1235	G	A	23	100
AT1G02260.1	AT1G02260	1816	T	C	57	100
AT1G02260.1	AT1G02260	2023	A	T	26	100
AT1G02300.1	AT1G02300	601	T	C	73	100
AT1G02300.1	AT1G02300	631	C	G	73	100
AT1G02300.1	AT1G02300	703	A	C	46	100
AT1G02300.1	AT1G02300	723	A	T	31	100
AT1G02300.1	AT1G02300	726	C	T	28	100
AT1G02300.1	AT1G02300	727	A	G	30	100
AT1G02300.1	AT1G02300	736	C	T	43	100
AT1G02300.1	AT1G02300	807	T	A	70	100
AT1G02300.1	AT1G02300	882	A	G	83	100
AT1G02305.1	AT1G02305	78	A	C	14	100
AT1G02305.1	AT1G02305	109	T	A	22	100
AT1G02305.1	AT1G02305	281	A	C	78	98.71
AT1G02305.1	AT1G02305	413	G	A	71	100
AT1G02305.1	AT1G02305	422	A	G	66	100
AT1G02305.1	AT1G02305	425	C	T	65	100
AT1G02305.1	AT1G02305	728	C	T	97	100
AT1G02305.1	AT1G02305	1240	T	C	85	100
AT1G02305.1	AT1G02305	1322	C	G	55	100
AT1G02340.1	AT1G02340	392	T	G	13	100
AT1G02340.1	AT1G02340	433	A	C	18	100
AT1G02340.1	AT1G02340	514	G	A	23	100
AT1G02350.1	AT1G02350	395	G	A	5	100
AT1G02370.1	AT1G02370	1418	C	A	34	100
AT1G02370.1	AT1G02370	1423	T	C	32	100
AT1G02370.1	AT1G02370	1450	G	A	32	100
AT1G02370.1	AT1G02370	1472	T	A	36	100
AT1G02370.1	AT1G02370	1501	T	A	39	100
AT1G02405.1	AT1G02405	283	A	C	17	100
AT1G02405.1	AT1G02405	435	G	T	8	100
AT1G02405.1	AT1G02405	486	T	A	5	100
AT1G02410.1	AT1G02410	1048	T	A	42	100
AT1G02410.1	AT1G02410	1061	C	T	40	100
AT1G02410.1	AT1G02410	1081	T	C	26	100
AT1G02410.1	AT1G02410	1106	A	G	20	100
AT1G02420.1	AT1G02420	1043	C	G	13	100
AT1G02430.1	AT1G02430	466	C	A	9	100
AT1G02430.1	AT1G02430	584	T	C	20	100
AT1G02475.1	AT1G02475	349	G	T	32	100
AT1G02475.1	AT1G02475	400	T	C	33	100
AT1G02475.1	AT1G02475	410	C	G	38	100
AT1G02500.1	AT1G02500	282	C	G	96	97.91
AT1G02500.2	AT1G02500	282	C	G	95	98.94
AT1G02520.1	AT1G02520	538	G	T	15	100
AT1G02520.1	AT1G02520	1072	G	T	49	100
AT1G02520.1	AT1G02520	1158	A	G	18	100
AT1G02520.1	AT1G02520	1252	T	C	85	100
AT1G02520.1	AT1G02520	1258	T	C	80	100
AT1G02520.1	AT1G02520	1341	A	C	63	100
AT1G02520.1	AT1G02520	1345	T	C	57	100
AT1G02520.1	AT1G02520	1354	G	A	54	100
AT1G02520.1	AT1G02520	1369	G	T	71	98.59
AT1G02520.1	AT1G02520	1399	T	C	73	100
AT1G02520.1	AT1G02520	1438	G	A	68	100
AT1G02520.1	AT1G02520	1445	T	A	60	100
AT1G02520.1	AT1G02520	1615	G	A	24	100
AT1G02520.1	AT1G02520	1660	T	C	29	100
AT1G02520.1	AT1G02520	1681	G	A	11	100
AT1G02520.1	AT1G02520	1684	C	T	8	100
AT1G02520.1	AT1G02520	1705	G	T	8	100
AT1G02520.1	AT1G02520	2134	G	A	5	100
AT1G02520.1	AT1G02520	2572	A	G	14	100
AT1G02520.1	AT1G02520	3007	C	T	96	100
AT1G02520.1	AT1G02520	3034	C	T	103	100
AT1G02520.1	AT1G02520	3052	C	T	94	100
AT1G02520.1	AT1G02520	3107	T	G	61	100
AT1G02520.1	AT1G02520	3136	G	T	18	100
AT1G02520.1	AT1G02520	3142	C	T	31	100
AT1G02520.1	AT1G02520	3148	C	T	42	100
AT1G02520.1	AT1G02520	3227	C	T	117	100
AT1G02520.1	AT1G02520	3256	A	G	92	100
AT1G02520.1	AT1G02520	3304	T	G	96	100
AT1G02520.1	AT1G02520	3733	T	G	79	100
AT1G02520.1	AT1G02520	3841	T	A	55	100
AT1G02530.1	AT1G02530	403	A	G	99	100
AT1G02530.1	AT1G02530	511	A	T	116	100
AT1G02530.1	AT1G02530	677	G	C	40	100
AT1G02530.1	AT1G02530	793	A	T	92	98.91
AT1G02530.1	AT1G02530	808	A	T	90	100
AT1G02530.1	AT1G02530	821	T	G	80	100
AT1G02530.1	AT1G02530	836	T	C	100	100
AT1G02530.1	AT1G02530	1040	A	T	82	100
AT1G02530.1	AT1G02530	1199	T	C	16	100
AT1G02530.1	AT1G02530	1202	T	C	17	100
AT1G02530.1	AT1G02530	1242	C	T	11	100
AT1G02530.1	AT1G02530	1244	G	A	10	100
AT1G02530.1	AT1G02530	1335	A	G	5	100
AT1G02530.1	AT1G02530	1343	T	C	10	100
AT1G02530.1	AT1G02530	1379	C	A	6	100
AT1G02530.1	AT1G02530	1406	G	A	27	100
AT1G02530.1	AT1G02530	1413	T	A	37	100
AT1G02530.1	AT1G02530	1453	C	T	54	100
AT1G02530.1	AT1G02530	1454	A	G	53	100
AT1G02530.1	AT1G02530	1469	T	C	66	100
AT1G02530.1	AT1G02530	1509	A	G	94	100
AT1G02530.1	AT1G02530	1529	A	G	102	100
AT1G02530.1	AT1G02530	1583	G	A	75	100
AT1G02530.1	AT1G02530	1595	A	G	54	100
AT1G02530.1	AT1G02530	1620	G	A	30	100
AT1G02530.1	AT1G02530	1628	T	C	22	100
AT1G02530.1	AT1G02530	1664	C	T	8	100
AT1G02530.1	AT1G02530	1673	G	T	19	100
AT1G02530.1	AT1G02530	1697	C	G	53	100
AT1G02530.1	AT1G02530	1721	G	T	94	100
AT1G02530.1	AT1G02530	1745	A	T	106	100
AT1G02530.1	AT1G02530	1866	A	C	91	100
AT1G02530.1	AT1G02530	1937	A	G	102	100
AT1G02530.1	AT1G02530	2027	T	A	102	100
AT1G02530.1	AT1G02530	2070	G	A	103	99.02
AT1G02530.1	AT1G02530	2101	G	C	102	100
AT1G02530.1	AT1G02530	2236	C	T	104	100
AT1G02530.1	AT1G02530	2259	T	C	98	100
AT1G02530.1	AT1G02530	2564	A	G	106	100
AT1G02530.1	AT1G02530	2951	T	C	42	97.61
AT1G02530.1	AT1G02530	2954	C	T	34	100
AT1G02530.1	AT1G02530	2963	C	A	15	100
AT1G02530.1	AT1G02530	2972	T	G	6	100
AT1G02530.1	AT1G02530	3026	C	T	8	100
AT1G02530.1	AT1G02530	3044	C	T	46	100
AT1G02530.1	AT1G02530	3099	T	G	105	100
AT1G02530.1	AT1G02530	3134	C	T	104	100
AT1G02530.1	AT1G02530	3140	C	T	92	100
AT1G02530.1	AT1G02530	3163	G	A	46	97.82
AT1G02530.1	AT1G02530	3212	G	T	7	100
AT1G02530.1	AT1G02530	3233	T	C	16	100
AT1G02530.1	AT1G02530	3308	C	T	46	97.82
AT1G02530.1	AT1G02530	3332	A	G	9	100
AT1G02530.1	AT1G02530	3535	A	G	11	100
AT1G02530.1	AT1G02530	3584	T	A	6	100
AT1G02530.1	AT1G02530	3644	A	G	34	100
AT1G02530.1	AT1G02530	3657	C	G	12	100
AT1G02530.1	AT1G02530	3809	A	C	10	100
AT1G02530.1	AT1G02530	3812	C	A	11	100
AT1G02530.1	AT1G02530	3830	C	G	24	100
AT1G02530.1	AT1G02530	3833	T	A	29	100
AT1G02560.1	AT1G02560	1226	A	T	37	100
AT1G02580.1	AT1G02580	334	T	A	8	100
AT1G02580.1	AT1G02580	337	A	T	7	100
AT1G02580.1	AT1G02580	660	G	A	8	100
AT1G02610.1	AT1G02610	427	T	C	18	100
AT1G02640.1	AT1G02640	1394	G	A	14	100
AT1G02640.1	AT1G02640	2482	G	A	18	100
AT1G02660.1	AT1G02660	379	A	G	16	100
AT1G02660.1	AT1G02660	444	G	C	9	100
AT1G02660.1	AT1G02660	451	A	C	9	100
AT1G02660.1	AT1G02660	528	T	C	11	100
AT1G02660.1	AT1G02660	597	A	G	18	100
AT1G02660.1	AT1G02660	820	A	G	9	100
AT1G02660.1	AT1G02660	1078	T	G	25	100
AT1G02660.1	AT1G02660	1090	C	T	23	100
AT1G02660.1	AT1G02660	1157	A	G	18	100
AT1G02660.1	AT1G02660	1907	C	T	20	100
AT1G02660.1	AT1G02660	1921	T	C	18	100
AT1G02660.1	AT1G02660	1978	T	A	19	100
AT1G02660.1	AT1G02660	2236	C	T	25	100
AT1G02660.1	AT1G02660	2403	C	T	20	100
AT1G02660.1	AT1G02660	2511	A	C	12	100
AT1G02670.1	AT1G02670	1773	A	C	6	100
AT1G02680.1	AT1G02680	552	G	T	48	100
AT1G02680.1	AT1G02680	566	A	G	40	100
AT1G02680.1	AT1G02680	587	G	C	30	100
AT1G02680.1	AT1G02680	635	T	G	5	100
AT1G02680.1	AT1G02680	636	G	T	5	100
AT1G02680.1	AT1G02680	733	T	C	14	100
AT1G02680.1	AT1G02680	763	G	C	18	100
AT1G02680.1	AT1G02680	788	A	G	10	100
AT1G02680.1	AT1G02680	796	A	C	6	100
AT1G02680.1	AT1G02680	804	C	A	6	100
AT1G02680.1	AT1G02680	822	A	G	6	100
AT1G02690.1	AT1G02690	505	A	G	7	100
AT1G02690.1	AT1G02690	1123	G	A	11	100
AT1G02690.1	AT1G02690	1607	A	T	51	100
AT1G02690.1	AT1G02690	1617	C	T	53	100
AT1G02690.1	AT1G02690	1656	A	G	37	100
AT1G02690.1	AT1G02690	1720	G	T	29	100
AT1G02690.2	AT1G02690	505	A	G	6	100
AT1G02690.2	AT1G02690	1126	G	A	12	100
AT1G02690.2	AT1G02690	1610	A	T	41	100
AT1G02690.2	AT1G02690	1620	C	T	42	100
AT1G02690.2	AT1G02690	1659	A	G	30	100
AT1G02690.2	AT1G02690	1723	G	T	29	96.55
AT1G02690.2	AT1G02690	1836	T	G	18	100
AT1G02720.1	AT1G02720	257	T	A	22	100
AT1G02720.1	AT1G02720	494	T	C	21	100
AT1G02720.1	AT1G02720	1114	A	G	30	100
AT1G02720.1	AT1G02720	1273	C	T	51	100
AT1G02720.1	AT1G02720	1380	A	C	23	100
AT1G02720.1	AT1G02720	1410	G	A	30	100
AT1G02720.1	AT1G02720	1520	G	A	57	100
AT1G02720.1	AT1G02720	1575	G	T	45	100
AT1G02720.1	AT1G02720	1590	A	G	30	100
AT1G02720.2	AT1G02720	257	T	A	22	100
AT1G02720.2	AT1G02720	494	T	C	21	100
AT1G02720.2	AT1G02720	1114	A	G	41	100
AT1G02720.2	AT1G02720	1273	C	T	49	100
AT1G02720.2	AT1G02720	1380	A	C	16	100
AT1G02730.1	AT1G02730	2074	T	G	5	100
AT1G02730.1	AT1G02730	2086	C	T	5	100
AT1G02730.1	AT1G02730	2206	A	G	6	100
AT1G02730.1	AT1G02730	2983	C	T	5	100
AT1G02730.1	AT1G02730	3142	C	A	8	100
AT1G02730.1	AT1G02730	3340	T	C	5	100
AT1G02730.1	AT1G02730	3349	A	G	5	100
AT1G02730.1	AT1G02730	3593	T	C	9	100
AT1G02740.1	AT1G02740	1005	A	G	22	100
AT1G02740.1	AT1G02740	1249	A	C	10	100
AT1G02740.1	AT1G02740	1274	C	G	7	100
AT1G02770.1	AT1G02770	60	G	A	5	100
AT1G02770.1	AT1G02770	109	G	A	12	100
AT1G02770.1	AT1G02770	115	G	A	14	100
AT1G02770.1	AT1G02770	221	A	T	23	100
AT1G02770.1	AT1G02770	396	A	C	42	100
AT1G02770.1	AT1G02770	720	G	A	72	100
AT1G02780.1	AT1G02780	101	G	A	45	100
AT1G02780.1	AT1G02780	155	C	T	76	100
AT1G02780.1	AT1G02780	236	A	T	95	98.94
AT1G02780.1	AT1G02780	332	A	G	89	100
AT1G02780.1	AT1G02780	509	A	T	74	98.64
AT1G02780.1	AT1G02780	771	C	G	99	100
AT1G02780.1	AT1G02780	963	T	A	36	100
AT1G02780.1	AT1G02780	974	T	A	27	100
AT1G02800.1	AT1G02800	1076	C	A	63	100
AT1G02800.1	AT1G02800	1162	A	G	75	100
AT1G02816.1	AT1G02816	131	A	T	28	100
AT1G02820.1	AT1G02820	317	C	T	12	100
AT1G02840.2	AT1G02840	1076	T	C	11	100
AT1G02870.1	AT1G02870	225	C	G	61	100
AT1G02900.1	AT1G02900	378	C	A	26	100
AT1G02930.1	AT1G02930	26	T	G	57	100
AT1G02930.2	AT1G02930	55	T	G	71	100
AT1G02940.1	AT1G02940	19	C	G	8	100
AT1G02940.1	AT1G02940	22	G	A	13	100
AT1G02940.1	AT1G02940	141	A	C	57	100
AT1G02940.1	AT1G02940	193	G	A	72	100
AT1G02940.1	AT1G02940	328	A	C	79	100
AT1G02940.1	AT1G02940	376	A	C	82	100
AT1G02940.1	AT1G02940	668	T	A	78	100
AT1G02970.1	AT1G02970	675	G	A	15	100
AT1G02970.1	AT1G02970	860	G	A	14	100
AT1G02970.1	AT1G02970	1673	T	C	32	100
AT1G02980.1	AT1G02980	274	T	C	11	100
AT1G02980.1	AT1G02980	624	C	G	6	100
AT1G02980.1	AT1G02980	1338	G	A	15	100
AT1G02980.1	AT1G02980	1515	G	A	16	100
AT1G02980.1	AT1G02980	1672	T	C	23	100
AT1G02990.2	AT1G02990	1089	C	T	6	100
AT1G02990.3	AT1G02990	1097	C	T	8	100
AT1G03030.1	AT1G03030	941	C	A	36	100
AT1G03030.1	AT1G03030	1236	C	T	17	100
AT1G03040.1	AT1G03040	1150	T	G	84	100
AT1G03040.2	AT1G03040	1134	T	G	86	100
AT1G03060.1	AT1G03060	3258	G	T	6	100
AT1G03070.1	AT1G03070	351	T	C	7	100
AT1G03080.1	AT1G03080	1265	G	T	7	100
AT1G03080.1	AT1G03080	3780	A	G	30	100
AT1G03080.1	AT1G03080	4357	C	T	19	100
AT1G03080.1	AT1G03080	4487	A	G	32	100
AT1G03080.1	AT1G03080	4577	T	C	19	100
AT1G03080.1	AT1G03080	5382	A	G	81	100
AT1G03090.1	AT1G03090	1725	C	G	25	100
AT1G03090.1	AT1G03090	1808	A	G	22	100
AT1G03090.1	AT1G03090	2387	A	T	6	100
AT1G03090.2	AT1G03090	693	T	G	9	100
AT1G03090.2	AT1G03090	1785	C	G	21	100
AT1G03090.2	AT1G03090	1868	A	G	19	100
AT1G03090.2	AT1G03090	2447	A	T	8	100
AT1G03106.1	AT1G03106	598	G	A	6	100
AT1G03106.1	AT1G03106	606	T	C	5	100
AT1G03110.1	AT1G03110	605	C	T	15	100
AT1G03110.1	AT1G03110	1262	A	T	33	96.96
AT1G03110.1	AT1G03110	1515	T	A	11	100
AT1G03120.1	AT1G03120	371	A	C	6	100
AT1G03130.1	AT1G03130	719	T	A	22	100
AT1G03140.1	AT1G03140	872	T	C	72	100
AT1G03140.1	AT1G03140	905	C	T	74	100
AT1G03150.1	AT1G03150	704	G	C	12	100
AT1G03150.1	AT1G03150	712	T	C	9	100
AT1G03160.1	AT1G03160	2180	A	G	5	100
AT1G03160.1	AT1G03160	2181	A	C	5	100
AT1G03160.1	AT1G03160	2280	T	C	6	100
AT1G03170.1	AT1G03170	341	G	A	8	100
AT1G03170.1	AT1G03170	433	C	A	11	100
AT1G03170.1	AT1G03170	451	C	A	12	100
AT1G03170.1	AT1G03170	651	T	G	16	100
AT1G03170.1	AT1G03170	931	A	C	8	100
AT1G03180.1	AT1G03180	791	A	G	6	100
AT1G03190.1	AT1G03190	2046	T	C	20	100
AT1G03190.1	AT1G03190	2433	A	C	11	100
AT1G03190.2	AT1G03190	2109	T	C	22	100
AT1G03190.2	AT1G03190	2496	A	C	13	100
AT1G03220.1	AT1G03220	1044	A	G	5	100
AT1G03220.1	AT1G03220	1191	T	G	8	100
AT1G03220.1	AT1G03220	1197	T	C	8	100
AT1G03260.1	AT1G03260	53	C	T	6	100
AT1G03280.1	AT1G03280	150	C	G	14	100
AT1G03280.1	AT1G03280	208	T	C	19	100
AT1G03280.1	AT1G03280	573	C	T	23	100
AT1G03290.1	AT1G03290	779	C	G	40	100
AT1G03290.1	AT1G03290	995	A	C	57	100
AT1G03290.2	AT1G03290	175	C	T	8	100
AT1G03290.2	AT1G03290	935	C	G	43	100
AT1G03290.2	AT1G03290	1151	A	C	53	100
AT1G03290.2	AT1G03290	2034	A	T	58	100
AT1G03300.1	AT1G03300	313	A	G	5	100
AT1G03300.1	AT1G03300	513	G	T	9	100
AT1G03300.1	AT1G03300	621	G	C	6	100
AT1G03300.1	AT1G03300	1265	T	C	10	100
AT1G03310.1	AT1G03310	1288	C	T	13	100
AT1G03310.1	AT1G03310	2093	A	T	28	100
AT1G03310.1	AT1G03310	2179	T	C	43	100
AT1G03310.2	AT1G03310	1296	C	T	10	100
AT1G03310.2	AT1G03310	2101	A	T	24	100
AT1G03310.2	AT1G03310	2187	T	C	33	100
AT1G03350.1	AT1G03350	860	C	T	76	100
AT1G03360.1	AT1G03360	946	T	C	52	100
AT1G03365.1	AT1G03365	1747	G	A	36	100
AT1G03365.1	AT1G03365	2608	T	G	50	100
AT1G03365.1	AT1G03365	2751	T	G	18	100
AT1G03370.1	AT1G03370	1349	C	T	6	100
AT1G03370.1	AT1G03370	3393	C	G	25	100
AT1G03380.1	AT1G03380	2378	T	A	20	100
AT1G03380.1	AT1G03380	2927	G	A	38	100
AT1G03400.1	AT1G03400	911	C	A	9	100
AT1G03410.1	AT1G03410	73	A	T	10	100
AT1G03410.1	AT1G03410	105	G	A	9	100
AT1G03410.1	AT1G03410	326	C	A	11	100
AT1G03410.1	AT1G03410	545	A	G	5	100
AT1G03420.1	AT1G03420	695	G	T	8	100
AT1G03420.1	AT1G03420	872	G	A	5	100
AT1G03420.1	AT1G03420	916	C	T	9	100
AT1G03420.1	AT1G03420	948	T	A	8	100
AT1G03430.1	AT1G03430	754	A	G	5	100
AT1G03440.1	AT1G03440	1224	G	A	8	100
AT1G03445.1	AT1G03445	1480	C	T	7	100
AT1G03445.1	AT1G03445	1575	A	G	11	100
AT1G03445.1	AT1G03445	2588	T	A	10	100
AT1G03457.1	AT1G03457	446	A	G	11	100
AT1G03457.1	AT1G03457	475	C	T	9	100
AT1G03457.1	AT1G03457	631	T	C	6	100
AT1G03457.1	AT1G03457	760	C	T	5	100
AT1G03457.1	AT1G03457	863	G	A	6	100
AT1G03457.1	AT1G03457	872	T	C	5	100
AT1G03457.1	AT1G03457	1363	A	C	5	100
AT1G03457.1	AT1G03457	1366	C	A	5	100
AT1G03457.1	AT1G03457	1434	T	G	5	100
AT1G03457.1	AT1G03457	1457	G	A	7	100
AT1G03457.1	AT1G03457	1463	C	T	5	100
AT1G03457.1	AT1G03457	1533	T	C	6	100
AT1G03457.2	AT1G03457	96	C	T	9	100
AT1G03457.2	AT1G03457	608	T	C	6	100
AT1G03457.2	AT1G03457	623	A	G	5	100
AT1G03457.2	AT1G03457	737	C	T	5	100
AT1G03457.2	AT1G03457	840	G	A	9	100
AT1G03457.2	AT1G03457	849	T	C	10	100
AT1G03457.2	AT1G03457	1022	T	C	5	100
AT1G03457.2	AT1G03457	1434	G	A	5	100
AT1G03457.2	AT1G03457	1440	C	T	5	100
AT1G03457.2	AT1G03457	1510	T	C	5	100
AT1G03470.2	AT1G03470	807	G	A	7	100
AT1G03495.1	AT1G03495	264	A	T	9	100
AT1G03510.1	AT1G03510	732	A	C	12	100
AT1G03520.1	AT1G03520	489	T	C	11	100
AT1G03520.1	AT1G03520	730	C	G	7	100
AT1G03530.1	AT1G03530	759	G	A	35	100
AT1G03530.1	AT1G03530	1139	C	G	39	100
AT1G03530.1	AT1G03530	1358	T	C	18	100
AT1G03560.1	AT1G03560	1098	G	C	11	100
AT1G03560.1	AT1G03560	1528	T	A	27	100
AT1G03560.1	AT1G03560	2173	A	G	8	100
AT1G03560.1	AT1G03560	2223	T	C	9	100
AT1G03590.1	AT1G03590	197	T	C	27	100
AT1G03590.1	AT1G03590	321	A	C	40	100
AT1G03590.1	AT1G03590	973	A	G	54	100
AT1G03590.1	AT1G03590	1038	A	G	55	100
AT1G03600.1	AT1G03600	237	T	C	24	95.83
AT1G03610.1	AT1G03610	208	T	A	5	100
AT1G03610.1	AT1G03610	442	A	G	17	100
AT1G03630.1	AT1G03630	1254	T	G	22	100
AT1G03630.2	AT1G03630	1239	T	G	27	100
AT1G03680.1	AT1G03680	109	T	C	24	100
AT1G03680.1	AT1G03680	646	T	C	80	98.75
AT1G03680.1	AT1G03680	830	G	A	24	100
AT1G03687.1	AT1G03687	265	T	G	7	100
AT1G03687.1	AT1G03687	276	T	G	7	100
AT1G03687.1	AT1G03687	816	G	A	13	100
AT1G03687.1	AT1G03687	948	A	G	21	100
AT1G03687.1	AT1G03687	1092	T	A	7	100
AT1G03687.2	AT1G03687	265	T	G	9	100
AT1G03687.2	AT1G03687	276	T	G	7	100
AT1G03687.2	AT1G03687	816	G	A	5	100
AT1G03687.2	AT1G03687	1183	T	A	16	100
AT1G03710.2	AT1G03710	570	A	G	5	100
AT1G03740.1	AT1G03740	749	G	C	9	100
AT1G03740.1	AT1G03740	939	G	A	8	100
AT1G03740.1	AT1G03740	1575	A	G	8	100
AT1G03740.1	AT1G03740	1623	T	A	8	100
AT1G03740.1	AT1G03740	1732	T	C	9	100
AT1G03740.2	AT1G03740	749	G	C	9	100
AT1G03740.2	AT1G03740	939	G	A	14	100
AT1G03740.2	AT1G03740	1623	T	A	5	100
AT1G03740.2	AT1G03740	1732	T	C	8	100
AT1G03750.1	AT1G03750	1355	A	C	10	100
AT1G03760.1	AT1G03760	192	C	T	15	100
AT1G03760.1	AT1G03760	687	T	C	32	100
AT1G03760.1	AT1G03760	787	G	A	29	100
AT1G03770.1	AT1G03770	1501	G	T	9	100
AT1G03770.2	AT1G03770	332	C	G	9	100
AT1G03770.2	AT1G03770	1548	G	T	12	100
AT1G03770.3	AT1G03770	309	C	G	9	100
AT1G03770.3	AT1G03770	1519	G	T	13	100
AT1G03800.1	AT1G03800	398	G	A	20	100
AT1G03830.1	AT1G03830	739	C	T	6	100
AT1G03830.1	AT1G03830	1153	G	A	9	100
AT1G03830.1	AT1G03830	1395	A	G	13	100
AT1G03830.1	AT1G03830	1781	A	C	12	100
AT1G03830.1	AT1G03830	2743	G	A	11	100
AT1G03830.2	AT1G03830	1354	G	A	14	100
AT1G03830.2	AT1G03830	1596	A	G	11	100
AT1G03830.2	AT1G03830	1982	A	C	13	100
AT1G03830.2	AT1G03830	2944	G	A	14	100
AT1G03920.1	AT1G03920	1721	G	A	9	100
AT1G03930.1	AT1G03930	1618	G	A	23	100
AT1G03930.1	AT1G03930	1859	C	G	15	100
AT1G03930.1	AT1G03930	2021	G	A	25	100
AT1G03930.1	AT1G03930	2036	C	T	25	100
AT1G03950.1	AT1G03950	45	A	C	8	100
AT1G03950.1	AT1G03950	61	A	T	11	100
AT1G03960.1	AT1G03960	570	A	T	5	100
AT1G03970.1	AT1G03970	666	A	G	71	98.59
AT1G03980.1	AT1G03980	1599	A	G	6	100
AT1G03980.1	AT1G03980	2142	T	C	71	100
AT1G03990.1	AT1G03990	1356	C	T	5	100
AT1G04000.1	AT1G04000	488	A	T	71	100
AT1G04000.1	AT1G04000	527	A	C	69	100
AT1G04010.1	AT1G04010	1975	G	A	54	100
AT1G04020.1	AT1G04020	405	T	G	12	100
AT1G04020.1	AT1G04020	1231	T	C	13	100
AT1G04020.1	AT1G04020	1644	G	C	16	100
AT1G04020.1	AT1G04020	1808	A	C	19	100
AT1G04020.1	AT1G04020	2131	A	G	33	100
AT1G04020.2	AT1G04020	405	T	G	6	100
AT1G04020.2	AT1G04020	1228	T	C	15	100
AT1G04020.2	AT1G04020	1641	G	C	13	100
AT1G04020.2	AT1G04020	1805	A	C	30	100
AT1G04020.2	AT1G04020	2128	A	G	48	100
AT1G04030.1	AT1G04030	1728	T	C	26	100
AT1G04040.1	AT1G04040	937	A	T	16	100
AT1G04040.1	AT1G04040	997	C	A	7	100
AT1G04050.1	AT1G04050	284	G	A	25	100
AT1G04050.1	AT1G04050	1062	C	T	5	100
AT1G04050.1	AT1G04050	1554	T	G	8	100
AT1G04050.1	AT1G04050	1616	T	C	6	100
AT1G04050.1	AT1G04050	1642	G	A	10	100
AT1G04050.1	AT1G04050	1945	C	T	9	100
AT1G04050.1	AT1G04050	2292	T	A	8	100
AT1G04050.1	AT1G04050	2463	G	A	6	100
AT1G04080.1	AT1G04080	1383	T	A	28	100
AT1G04080.1	AT1G04080	1874	C	A	28	100
AT1G04080.1	AT1G04080	1914	A	G	22	100
AT1G04080.1	AT1G04080	2432	C	T	7	100
AT1G04080.1	AT1G04080	2449	G	C	6	100
AT1G04080.2	AT1G04080	687	T	A	29	100
AT1G04080.2	AT1G04080	1178	C	A	26	100
AT1G04080.2	AT1G04080	1218	A	G	22	100
AT1G04080.2	AT1G04080	1736	C	T	15	100
AT1G04080.2	AT1G04080	1753	G	C	20	100
AT1G04080.3	AT1G04080	1579	T	A	22	100
AT1G04080.3	AT1G04080	2070	C	A	28	100
AT1G04080.3	AT1G04080	2110	A	G	21	100
AT1G04080.3	AT1G04080	2628	C	T	12	100
AT1G04080.3	AT1G04080	2645	G	C	16	100
AT1G04090.1	AT1G04090	633	G	A	9	100
AT1G04090.1	AT1G04090	1233	A	G	5	100
AT1G04090.1	AT1G04090	1575	T	G	10	100
AT1G04100.1	AT1G04100	674	G	A	11	100
AT1G04100.1	AT1G04100	837	A	G	27	100
AT1G04120.1	AT1G04120	201	T	C	5	100
AT1G04120.1	AT1G04120	274	C	T	7	100
AT1G04120.1	AT1G04120	5023	G	C	37	100
AT1G04120.2	AT1G04120	5128	G	C	31	100
AT1G04130.1	AT1G04130	358	C	G	26	100
AT1G04140.1	AT1G04140	1039	G	A	22	100
AT1G04140.1	AT1G04140	1686	C	T	30	100
AT1G04140.1	AT1G04140	1872	T	C	32	100
AT1G04140.1	AT1G04140	1906	G	A	43	100
AT1G04140.1	AT1G04140	2286	G	A	53	100
AT1G04140.1	AT1G04140	2973	G	A	25	96
AT1G04140.1	AT1G04140	3083	G	A	13	100
AT1G04140.2	AT1G04140	1039	G	A	27	100
AT1G04140.2	AT1G04140	1686	C	T	28	100
AT1G04140.2	AT1G04140	1872	T	C	23	100
AT1G04140.2	AT1G04140	1906	G	A	29	100
AT1G04140.2	AT1G04140	2286	G	A	57	100
AT1G04140.2	AT1G04140	3100	G	A	10	100
AT1G04160.1	AT1G04160	378	T	G	5	100
AT1G04160.1	AT1G04160	2188	A	C	5	100
AT1G04160.1	AT1G04160	3147	A	G	6	100
AT1G04160.1	AT1G04160	3169	T	A	6	100
AT1G04160.1	AT1G04160	3196	A	G	10	100
AT1G04160.1	AT1G04160	3231	C	T	9	100
AT1G04160.1	AT1G04160	3254	T	C	9	100
AT1G04160.1	AT1G04160	3330	T	G	10	100
AT1G04160.1	AT1G04160	3357	G	A	11	100
AT1G04160.1	AT1G04160	3423	G	A	10	100
AT1G04160.1	AT1G04160	3562	G	A	7	100
AT1G04160.1	AT1G04160	3834	A	G	8	100
AT1G04160.1	AT1G04160	4485	A	G	6	100
AT1G04170.1	AT1G04170	152	C	T	42	100
AT1G04170.1	AT1G04170	179	C	A	45	100
AT1G04170.1	AT1G04170	385	A	G	87	100
AT1G04170.1	AT1G04170	538	A	G	93	100
AT1G04170.1	AT1G04170	790	C	T	97	100
AT1G04170.1	AT1G04170	860	C	T	100	100
AT1G04170.1	AT1G04170	922	G	A	95	100
AT1G04170.1	AT1G04170	1060	C	T	69	100
AT1G04170.1	AT1G04170	1156	C	T	79	100
AT1G04170.1	AT1G04170	1171	T	A	81	100
AT1G04170.1	AT1G04170	1219	C	T	70	100
AT1G04170.1	AT1G04170	1225	T	A	71	100
AT1G04170.1	AT1G04170	1240	T	A	68	100
AT1G04170.1	AT1G04170	1264	T	C	86	100
AT1G04170.1	AT1G04170	1279	A	C	92	100
AT1G04170.1	AT1G04170	1693	A	G	17	100
AT1G04190.1	AT1G04190	157	T	G	9	100
AT1G04190.1	AT1G04190	164	C	G	6	100
AT1G04190.1	AT1G04190	182	A	C	9	100
AT1G04190.1	AT1G04190	185	G	A	11	100
AT1G04190.1	AT1G04190	224	A	C	31	100
AT1G04190.1	AT1G04190	251	T	C	44	100
AT1G04200.1	AT1G04200	1527	A	G	69	100
AT1G04200.1	AT1G04200	1541	G	C	72	100
AT1G04200.1	AT1G04200	1781	A	G	59	100
AT1G04200.1	AT1G04200	1817	G	T	70	100
AT1G04200.1	AT1G04200	1820	C	A	70	100
AT1G04200.1	AT1G04200	1910	A	T	72	100
AT1G04200.1	AT1G04200	1991	G	A	80	100
AT1G04200.1	AT1G04200	2012	A	G	83	100
AT1G04200.1	AT1G04200	2030	T	C	83	98.79
AT1G04200.1	AT1G04200	2207	T	C	53	100
AT1G04210.1	AT1G04210	399	C	G	5	100
AT1G04210.1	AT1G04210	835	G	A	11	100
AT1G04210.1	AT1G04210	1265	G	T	9	100
AT1G04210.1	AT1G04210	1478	G	T	9	100
AT1G04210.1	AT1G04210	1805	G	A	16	100
AT1G04210.1	AT1G04210	2058	C	T	26	100
AT1G04210.1	AT1G04210	2202	C	T	10	100
AT1G04210.1	AT1G04210	2469	C	T	22	100
AT1G04210.1	AT1G04210	3330	C	A	50	100
AT1G04210.1	AT1G04210	3749	T	A	61	100
AT1G04210.1	AT1G04210	3909	A	G	36	100
AT1G04220.1	AT1G04220	48	A	C	21	100
AT1G04220.1	AT1G04220	145	T	G	40	100
AT1G04220.1	AT1G04220	239	A	T	65	100
AT1G04220.1	AT1G04220	283	C	T	65	100
AT1G04220.1	AT1G04220	289	T	G	69	98.55
AT1G04220.1	AT1G04220	436	G	A	67	100
AT1G04220.1	AT1G04220	814	T	C	51	98.03
AT1G04220.1	AT1G04220	1596	C	T	70	100
AT1G04220.1	AT1G04220	1633	A	G	60	100
AT1G04220.1	AT1G04220	1641	T	C	60	98.33
AT1G04220.1	AT1G04220	1711	T	A	32	100
AT1G04220.1	AT1G04220	1720	A	T	28	96.42
AT1G04220.1	AT1G04220	1727	A	T	29	100
AT1G04230.1	AT1G04230	732	C	T	51	100
AT1G04240.1	AT1G04240	236	G	T	5	100
AT1G04260.1	AT1G04260	570	T	G	67	100
AT1G04260.1	AT1G04260	622	C	T	68	97.05
AT1G04270.1	AT1G04270	37	G	A	21	100
AT1G04270.1	AT1G04270	82	T	A	53	98.11
AT1G04270.1	AT1G04270	378	A	G	101	100
AT1G04270.1	AT1G04270	546	T	C	90	100
AT1G04270.1	AT1G04270	583	C	T	52	100
AT1G04270.1	AT1G04270	741	G	T	22	100
AT1G04270.2	AT1G04270	35	G	A	25	100
AT1G04270.2	AT1G04270	80	T	A	56	100
AT1G04270.2	AT1G04270	373	A	G	93	100
AT1G04270.2	AT1G04270	541	T	C	94	100
AT1G04270.2	AT1G04270	578	C	T	59	100
AT1G04270.2	AT1G04270	736	G	T	26	100
AT1G04290.1	AT1G04290	117	T	G	6	100
AT1G04290.1	AT1G04290	781	C	A	21	100
AT1G04295.1	AT1G04295	534	A	C	5	100
AT1G04300.1	AT1G04300	2924	T	A	17	100
AT1G04300.1	AT1G04300	3121	G	T	17	100
AT1G04300.1	AT1G04300	3277	G	T	23	100
AT1G04300.1	AT1G04300	3561	T	A	5	100
AT1G04300.2	AT1G04300	3121	T	A	14	100
AT1G04300.2	AT1G04300	3318	G	T	16	100
AT1G04300.2	AT1G04300	3474	G	T	34	100
AT1G04300.2	AT1G04300	3758	T	A	5	100
AT1G04300.3	AT1G04300	2948	T	A	16	100
AT1G04300.3	AT1G04300	3145	G	T	16	100
AT1G04300.3	AT1G04300	3301	G	T	27	100
AT1G04300.4	AT1G04300	2811	T	A	9	100
AT1G04300.4	AT1G04300	3008	G	T	9	100
AT1G04300.4	AT1G04300	3164	G	T	33	100
AT1G04300.4	AT1G04300	3448	T	A	10	100
AT1G04310.1	AT1G04310	1674	C	A	31	100
AT1G04310.1	AT1G04310	1681	G	A	31	100
AT1G04310.1	AT1G04310	1683	G	A	30	100
AT1G04310.1	AT1G04310	1686	T	C	32	100
AT1G04310.1	AT1G04310	1761	G	A	40	100
AT1G04310.1	AT1G04310	1770	C	G	37	100
AT1G04310.1	AT1G04310	1863	T	A	54	100
AT1G04310.1	AT1G04310	1983	T	G	43	100
AT1G04310.1	AT1G04310	2016	A	G	32	100
AT1G04310.1	AT1G04310	2232	T	A	11	100
AT1G04310.1	AT1G04310	2291	G	A	18	100
AT1G04340.1	AT1G04340	336	C	A	70	100
AT1G04340.1	AT1G04340	477	A	G	64	100
AT1G04340.1	AT1G04340	699	T	C	46	100
AT1G04380.1	AT1G04380	294	A	G	13	100
AT1G04380.1	AT1G04380	357	C	T	14	100
AT1G04380.1	AT1G04380	449	C	T	21	100
AT1G04380.1	AT1G04380	476	A	T	17	100
AT1G04380.1	AT1G04380	536	G	T	15	100
AT1G04380.1	AT1G04380	571	A	G	18	100
AT1G04380.1	AT1G04380	589	G	C	12	100
AT1G04380.1	AT1G04380	655	A	T	14	100
AT1G04380.1	AT1G04380	698	T	C	12	100
AT1G04380.1	AT1G04380	812	A	G	13	100
AT1G04380.1	AT1G04380	842	T	A	13	100
AT1G04380.1	AT1G04380	855	A	G	13	100
AT1G04380.1	AT1G04380	896	C	G	15	100
AT1G04380.1	AT1G04380	1083	T	A	11	100
AT1G04380.1	AT1G04380	1101	A	T	6	100
AT1G04380.1	AT1G04380	1155	T	C	5	100
AT1G04380.1	AT1G04380	1167	G	T	5	100
AT1G04390.1	AT1G04390	653	A	G	8	100
AT1G04390.1	AT1G04390	1385	G	A	7	100
AT1G04390.1	AT1G04390	1462	T	C	9	100
AT1G04390.1	AT1G04390	1730	G	A	6	100
AT1G04390.1	AT1G04390	1804	A	G	7	100
AT1G04390.1	AT1G04390	1871	A	G	11	100
AT1G04390.1	AT1G04390	1958	G	C	8	100
AT1G04390.1	AT1G04390	2048	C	T	7	100
AT1G04390.1	AT1G04390	2091	T	G	11	100
AT1G04390.1	AT1G04390	2291	G	C	9	100
AT1G04390.1	AT1G04390	2309	G	A	8	100
AT1G04390.1	AT1G04390	2327	T	C	6	100
AT1G04390.1	AT1G04390	2336	G	A	9	100
AT1G04390.1	AT1G04390	2357	T	C	12	100
AT1G04390.1	AT1G04390	2513	T	A	22	100
AT1G04390.1	AT1G04390	2534	T	C	25	100
AT1G04390.1	AT1G04390	2640	A	T	7	100
AT1G04390.1	AT1G04390	2641	T	C	8	100
AT1G04390.1	AT1G04390	2646	A	T	6	100
AT1G04390.1	AT1G04390	2775	C	A	9	100
AT1G04390.1	AT1G04390	2838	G	A	14	100
AT1G04390.1	AT1G04390	2841	A	G	13	100
AT1G04390.1	AT1G04390	2873	C	T	14	100
AT1G04390.1	AT1G04390	2889	G	A	6	100
AT1G04400.1	AT1G04400	303	G	A	9	100
AT1G04400.1	AT1G04400	422	G	C	11	100
AT1G04400.1	AT1G04400	613	A	T	14	100
AT1G04400.1	AT1G04400	673	C	T	7	100
AT1G04400.1	AT1G04400	676	C	T	8	100
AT1G04400.1	AT1G04400	683	A	G	9	100
AT1G04400.1	AT1G04400	715	C	T	12	100
AT1G04400.1	AT1G04400	742	C	T	17	100
AT1G04400.1	AT1G04400	994	G	C	8	100
AT1G04400.1	AT1G04400	1024	T	C	13	100
AT1G04400.1	AT1G04400	1174	A	G	26	100
AT1G04400.1	AT1G04400	1183	G	A	29	100
AT1G04400.1	AT1G04400	1303	G	A	19	100
AT1G04400.1	AT1G04400	1414	T	G	41	100
AT1G04400.1	AT1G04400	1444	C	T	29	100
AT1G04400.1	AT1G04400	1501	T	C	34	100
AT1G04400.1	AT1G04400	1525	A	G	35	100
AT1G04400.1	AT1G04400	1645	T	C	25	100
AT1G04400.1	AT1G04400	1657	C	T	23	100
AT1G04400.1	AT1G04400	1792	T	G	17	100
AT1G04400.1	AT1G04400	1813	T	A	20	100
AT1G04400.1	AT1G04400	1840	G	A	15	100
AT1G04400.1	AT1G04400	1858	C	T	9	100
AT1G04400.1	AT1G04400	1928	G	T	13	100
AT1G04400.1	AT1G04400	1957	C	G	27	100
AT1G04400.1	AT1G04400	1968	G	A	24	100
AT1G04400.1	AT1G04400	1981	T	A	26	100
AT1G04400.1	AT1G04400	2044	T	C	15	100
AT1G04400.1	AT1G04400	2053	G	A	14	100
AT1G04400.1	AT1G04400	2063	G	T	15	100
AT1G04400.1	AT1G04400	2077	A	G	14	100
AT1G04400.1	AT1G04400	2107	G	A	21	100
AT1G04400.1	AT1G04400	2125	G	A	18	100
AT1G04400.1	AT1G04400	2134	G	C	19	100
AT1G04400.1	AT1G04400	2239	G	A	20	100
AT1G04400.1	AT1G04400	2268	G	A	7	100
AT1G04400.1	AT1G04400	2398	T	C	11	100
AT1G04400.2	AT1G04400	248	G	C	8	100
AT1G04400.2	AT1G04400	439	A	T	17	100
AT1G04400.2	AT1G04400	499	C	T	13	100
AT1G04400.2	AT1G04400	502	C	T	15	100
AT1G04400.2	AT1G04400	509	A	G	16	100
AT1G04400.2	AT1G04400	541	C	T	15	100
AT1G04400.2	AT1G04400	568	C	T	16	100
AT1G04400.2	AT1G04400	820	G	C	13	100
AT1G04400.2	AT1G04400	850	T	C	24	100
AT1G04400.2	AT1G04400	1000	A	G	19	100
AT1G04400.2	AT1G04400	1009	G	A	24	100
AT1G04400.2	AT1G04400	1129	G	A	24	100
AT1G04400.2	AT1G04400	1240	T	G	37	100
AT1G04400.2	AT1G04400	1270	C	T	32	100
AT1G04400.2	AT1G04400	1327	T	C	33	100
AT1G04400.2	AT1G04400	1351	A	G	40	100
AT1G04400.2	AT1G04400	1471	T	C	30	100
AT1G04400.2	AT1G04400	1483	C	T	30	100
AT1G04400.2	AT1G04400	1618	T	G	15	100
AT1G04400.2	AT1G04400	1639	T	A	16	100
AT1G04400.2	AT1G04400	1666	G	A	16	100
AT1G04400.2	AT1G04400	1684	C	T	10	100
AT1G04400.2	AT1G04400	1754	G	T	16	100
AT1G04400.2	AT1G04400	1783	C	G	19	100
AT1G04400.2	AT1G04400	1794	G	A	21	100
AT1G04400.2	AT1G04400	1807	T	A	22	100
AT1G04400.2	AT1G04400	1870	T	C	18	100
AT1G04400.2	AT1G04400	1879	G	A	16	100
AT1G04400.2	AT1G04400	1889	G	T	14	100
AT1G04400.2	AT1G04400	1903	A	G	17	100
AT1G04400.2	AT1G04400	1933	G	A	17	100
AT1G04400.2	AT1G04400	1951	G	A	18	100
AT1G04400.2	AT1G04400	1960	G	C	20	100
AT1G04400.2	AT1G04400	2065	G	A	15	100
AT1G04400.2	AT1G04400	2094	G	A	6	100
AT1G04400.2	AT1G04400	2224	T	C	10	100
AT1G04410.1	AT1G04410	343	T	C	81	100
AT1G04410.1	AT1G04410	421	G	A	93	98.92
AT1G04410.1	AT1G04410	433	T	A	94	100
AT1G04410.1	AT1G04410	544	G	C	94	100
AT1G04410.1	AT1G04410	547	A	G	94	100
AT1G04410.1	AT1G04410	586	A	C	91	100
AT1G04410.1	AT1G04410	667	G	C	90	100
AT1G04410.1	AT1G04410	748	G	T	80	100
AT1G04410.1	AT1G04410	817	T	C	82	100
AT1G04410.1	AT1G04410	1033	C	G	85	98.82
AT1G04410.1	AT1G04410	1093	T	C	92	100
AT1G04410.1	AT1G04410	1105	C	G	101	100
AT1G04410.1	AT1G04410	1141	T	A	96	100
AT1G04410.1	AT1G04410	1187	G	T	90	98.88
AT1G04410.1	AT1G04410	1346	G	T	7	100
AT1G04410.1	AT1G04410	1384	C	T	7	100
AT1G04410.1	AT1G04410	1390	T	C	7	100
AT1G04410.1	AT1G04410	1392	T	A	8	100
AT1G04410.1	AT1G04410	1428	C	T	13	100
AT1G04410.1	AT1G04410	1454	G	A	12	100
AT1G04420.1	AT1G04420	49	A	T	7	100
AT1G04420.1	AT1G04420	56	G	A	7	100
AT1G04420.1	AT1G04420	162	G	A	18	100
AT1G04420.1	AT1G04420	191	T	A	22	100
AT1G04420.1	AT1G04420	215	T	C	25	100
AT1G04420.1	AT1G04420	218	C	T	24	100
AT1G04420.1	AT1G04420	248	C	A	24	100
AT1G04420.1	AT1G04420	297	C	T	24	100
AT1G04420.1	AT1G04420	458	G	A	29	100
AT1G04420.1	AT1G04420	470	G	A	29	100
AT1G04420.1	AT1G04420	498	A	G	33	100
AT1G04420.1	AT1G04420	575	C	T	30	100
AT1G04420.1	AT1G04420	719	T	C	25	100
AT1G04420.1	AT1G04420	746	C	T	35	100
AT1G04420.1	AT1G04420	754	C	T	35	100
AT1G04420.1	AT1G04420	920	C	A	30	100
AT1G04420.1	AT1G04420	1296	G	C	49	100
AT1G04420.1	AT1G04420	1302	G	C	49	100
AT1G04420.1	AT1G04420	1437	A	T	5	100
AT1G04430.1	AT1G04430	1901	T	C	45	100
AT1G04430.1	AT1G04430	2177	G	A	39	100
AT1G04430.1	AT1G04430	2248	A	G	16	100
AT1G04430.2	AT1G04430	1822	T	C	41	100
AT1G04430.2	AT1G04430	2098	G	A	45	100
AT1G04430.2	AT1G04430	2169	A	G	18	100
AT1G04440.1	AT1G04440	103	T	C	7	100
AT1G04440.1	AT1G04440	122	C	G	7	100
AT1G04440.1	AT1G04440	130	T	C	5	100
AT1G04440.1	AT1G04440	135	G	A	5	100
AT1G04440.1	AT1G04440	248	A	G	5	100
AT1G04440.1	AT1G04440	284	T	G	9	100
AT1G04440.1	AT1G04440	293	G	C	9	100
AT1G04440.1	AT1G04440	617	A	C	30	100
AT1G04440.1	AT1G04440	719	A	G	26	100
AT1G04440.1	AT1G04440	1902	G	A	59	100
AT1G04440.1	AT1G04440	1916	T	C	59	100
AT1G04445.1	AT1G04445	288	T	G	22	100
AT1G04480.1	AT1G04480	396	T	C	86	100
AT1G04480.1	AT1G04480	622	A	G	8	100
AT1G04510.1	AT1G04510	984	C	T	28	100
AT1G04510.2	AT1G04510	984	C	T	26	100
AT1G04530.1	AT1G04530	887	G	A	54	100
AT1G04550.1	AT1G04550	172	G	T	5	100
AT1G04550.1	AT1G04550	214	G	T	6	100
AT1G04550.1	AT1G04550	562	C	G	27	100
AT1G04550.1	AT1G04550	645	G	A	18	100
AT1G04550.1	AT1G04550	1379	T	A	5	100
AT1G04550.2	AT1G04550	172	G	T	9	100
AT1G04550.2	AT1G04550	214	G	T	7	100
AT1G04550.2	AT1G04550	562	C	G	17	100
AT1G04550.2	AT1G04550	645	G	A	29	100
AT1G04570.1	AT1G04570	337	C	G	6	100
AT1G04580.1	AT1G04580	612	G	T	5	100
AT1G04580.1	AT1G04580	622	A	G	5	100
AT1G04580.1	AT1G04580	2814	G	C	9	100
AT1G04580.1	AT1G04580	3279	A	T	16	100
AT1G04580.1	AT1G04580	3769	G	A	31	100
AT1G04590.1	AT1G04590	718	G	A	29	100
AT1G04590.1	AT1G04590	767	A	C	47	100
AT1G04590.1	AT1G04590	978	C	G	50	100
AT1G04590.1	AT1G04590	1035	A	T	16	100
AT1G04590.1	AT1G04590	1044	G	C	7	100
AT1G04590.1	AT1G04590	1091	G	T	6	100
AT1G04590.1	AT1G04590	1137	A	G	29	100
AT1G04590.1	AT1G04590	1147	G	A	25	100
AT1G04590.1	AT1G04590	1186	A	G	25	96
AT1G04590.1	AT1G04590	1195	A	C	25	100
AT1G04590.1	AT1G04590	1227	C	T	27	100
AT1G04590.1	AT1G04590	1230	T	G	27	100
AT1G04590.2	AT1G04590	236	A	T	6	100
AT1G04590.2	AT1G04590	251	T	G	8	100
AT1G04590.2	AT1G04590	717	G	A	40	100
AT1G04590.2	AT1G04590	766	A	C	40	100
AT1G04590.2	AT1G04590	986	C	G	42	100
AT1G04590.2	AT1G04590	1043	A	T	11	100
AT1G04590.2	AT1G04590	1052	G	C	5	100
AT1G04590.2	AT1G04590	1099	G	T	10	100
AT1G04590.2	AT1G04590	1145	A	G	27	100
AT1G04590.2	AT1G04590	1155	G	A	27	100
AT1G04590.2	AT1G04590	1194	A	G	20	100
AT1G04590.2	AT1G04590	1203	A	C	24	100
AT1G04590.2	AT1G04590	1235	C	T	28	100
AT1G04590.2	AT1G04590	1238	T	G	26	100
AT1G04630.1	AT1G04630	298	G	T	76	100
AT1G04630.1	AT1G04630	598	G	A	83	100
AT1G04635.1	AT1G04635	246	A	G	26	100
AT1G04635.1	AT1G04635	351	T	C	33	100
AT1G04635.1	AT1G04635	639	T	A	5	100
AT1G04640.1	AT1G04640	400	G	A	9	100
AT1G04640.2	AT1G04640	751	G	A	5	100
AT1G04650.1	AT1G04650	2082	C	T	7	100
AT1G04660.1	AT1G04660	449	A	G	5	100
AT1G04680.1	AT1G04680	839	G	C	10	100
AT1G04680.1	AT1G04680	845	C	T	10	100
AT1G04680.1	AT1G04680	884	A	G	10	100
AT1G04680.1	AT1G04680	893	T	C	9	100
AT1G04680.1	AT1G04680	983	G	T	6	100
AT1G04680.1	AT1G04680	1423	C	G	7	100
AT1G04680.1	AT1G04680	1477	A	C	7	100
AT1G04680.1	AT1G04680	1564	A	T	12	100
AT1G04680.1	AT1G04680	1712	T	A	8	100
AT1G04690.1	AT1G04690	1250	G	A	87	100
AT1G04700.1	AT1G04700	191	T	C	5	100
AT1G04700.1	AT1G04700	2018	A	T	5	100
AT1G04700.1	AT1G04700	2606	G	T	10	100
AT1G04710.1	AT1G04710	709	A	T	24	100
AT1G04710.1	AT1G04710	712	G	A	26	100
AT1G04730.1	AT1G04730	883	A	C	6	100
AT1G04750.1	AT1G04750	171	C	T	63	100
AT1G04750.1	AT1G04750	432	G	A	90	97.77
AT1G04750.1	AT1G04750	1042	T	C	22	100
AT1G04750.2	AT1G04750	138	C	T	27	100
AT1G04750.2	AT1G04750	285	G	A	91	96.7
AT1G04750.2	AT1G04750	895	T	C	20	100
AT1G04790.1	AT1G04790	312	A	G	16	100
AT1G04790.1	AT1G04790	854	G	A	12	100
AT1G04790.1	AT1G04790	2222	C	T	17	100
AT1G04810.1	AT1G04810	905	C	G	45	100
AT1G04810.1	AT1G04810	1107	G	C	39	97.43
AT1G04810.1	AT1G04810	1954	C	T	57	100
AT1G04810.1	AT1G04810	3080	A	G	27	100
AT1G04810.1	AT1G04810	3278	G	A	14	100
AT1G04820.1	AT1G04820	55	A	G	27	100
AT1G04820.1	AT1G04820	1653	G	A	43	100
AT1G04830.1	AT1G04830	401	T	A	10	100
AT1G04850.1	AT1G04850	305	T	C	86	100
AT1G04850.1	AT1G04850	1218	G	A	67	100
AT1G04850.1	AT1G04850	1404	T	A	77	97.4
AT1G04860.1	AT1G04860	1566	T	C	17	100
AT1G04860.1	AT1G04860	1641	C	T	12	100
AT1G04860.1	AT1G04860	2296	T	C	18	100
AT1G04860.1	AT1G04860	2476	C	T	40	100
AT1G04860.1	AT1G04860	2665	C	T	59	100
AT1G04870.1	AT1G04870	270	A	C	12	100
AT1G04870.1	AT1G04870	476	C	G	10	100
AT1G04870.1	AT1G04870	868	A	T	47	100
AT1G04870.1	AT1G04870	1341	T	C	35	100
AT1G04870.1	AT1G04870	1384	T	A	27	100
AT1G04870.2	AT1G04870	290	A	C	8	100
AT1G04870.2	AT1G04870	506	C	G	16	100
AT1G04870.2	AT1G04870	898	A	T	40	100
AT1G04870.2	AT1G04870	1371	T	C	24	100
AT1G04870.2	AT1G04870	1414	T	A	22	100
AT1G04880.1	AT1G04880	83	A	G	5	100
AT1G04880.1	AT1G04880	308	A	T	13	100
AT1G04900.1	AT1G04900	322	C	A	10	100
AT1G04910.1	AT1G04910	308	T	C	18	100
AT1G04910.1	AT1G04910	1141	A	G	5	100
AT1G04910.1	AT1G04910	1222	C	G	17	100
AT1G04910.1	AT1G04910	1614	A	G	53	100
AT1G04940.1	AT1G04940	406	A	T	37	100
AT1G04940.1	AT1G04940	504	G	A	30	100
AT1G04945.1	AT1G04945	1506	C	G	7	100
AT1G04945.2	AT1G04945	1581	C	G	5	100
AT1G04945.3	AT1G04945	555	G	A	25	100
AT1G04945.3	AT1G04945	2486	C	G	6	100
AT1G04970.1	AT1G04970	226	A	G	15	100
AT1G04970.1	AT1G04970	696	G	A	12	100
AT1G04970.1	AT1G04970	1435	C	A	20	100
AT1G04970.2	AT1G04970	267	G	A	17	100
AT1G04970.2	AT1G04970	1006	C	A	19	100
AT1G04980.1	AT1G04980	127	C	A	63	100
AT1G04980.1	AT1G04980	473	G	C	95	98.94
AT1G04990.1	AT1G04990	1196	C	T	25	96
AT1G05000.1	AT1G05000	813	A	T	14	100
AT1G05000.1	AT1G05000	892	A	T	11	100
AT1G05000.1	AT1G05000	908	A	C	13	100
AT1G05000.2	AT1G05000	901	A	T	15	100
AT1G05000.2	AT1G05000	980	A	T	7	100
AT1G05000.2	AT1G05000	996	A	C	8	100
AT1G05070.1	AT1G05070	656	C	T	78	100
AT1G05070.1	AT1G05070	770	A	G	59	100
AT1G05120.1	AT1G05120	1610	A	G	14	100
AT1G05120.1	AT1G05120	2177	C	T	32	100
AT1G05135.1	AT1G05135	384	T	C	7	100
AT1G05135.1	AT1G05135	879	T	C	15	100
AT1G05135.1	AT1G05135	882	C	T	13	100
AT1G05135.1	AT1G05135	949	G	A	21	100
AT1G05135.1	AT1G05135	972	T	C	22	100
AT1G05135.1	AT1G05135	987	T	C	19	100
AT1G05140.1	AT1G05140	223	G	A	8	100
AT1G05140.1	AT1G05140	276	G	A	9	100
AT1G05140.1	AT1G05140	350	C	G	18	100
AT1G05140.1	AT1G05140	1237	G	A	40	100
AT1G05150.1	AT1G05150	95	G	C	5	100
AT1G05150.1	AT1G05150	117	T	C	8	100
AT1G05150.1	AT1G05150	122	T	G	9	100
AT1G05150.1	AT1G05150	395	G	A	14	100
AT1G05150.1	AT1G05150	431	T	C	15	100
AT1G05150.1	AT1G05150	452	A	G	9	100
AT1G05150.1	AT1G05150	454	A	G	9	100
AT1G05150.1	AT1G05150	458	G	A	10	100
AT1G05150.1	AT1G05150	755	A	G	16	100
AT1G05150.1	AT1G05150	1319	C	T	32	100
AT1G05150.1	AT1G05150	1370	C	T	23	100
AT1G05150.1	AT1G05150	1379	G	A	22	100
AT1G05150.1	AT1G05150	1388	A	G	21	100
AT1G05150.1	AT1G05150	1454	T	C	30	100
AT1G05150.1	AT1G05150	1457	C	T	31	100
AT1G05150.1	AT1G05150	1550	G	A	30	100
AT1G05150.1	AT1G05150	1565	G	A	23	100
AT1G05150.1	AT1G05150	1568	C	T	25	100
AT1G05150.1	AT1G05150	1604	T	C	31	100
AT1G05150.1	AT1G05150	1670	A	G	29	96.55
AT1G05150.1	AT1G05150	2135	T	G	55	98.18
AT1G05150.1	AT1G05150	2547	G	A	63	100
AT1G05160.1	AT1G05160	342	C	T	7	100
AT1G05160.1	AT1G05160	414	G	T	7	100
AT1G05160.1	AT1G05160	423	G	A	6	100
AT1G05160.1	AT1G05160	526	T	C	9	100
AT1G05160.1	AT1G05160	601	A	C	10	100
AT1G05160.1	AT1G05160	769	T	G	5	100
AT1G05160.1	AT1G05160	1063	G	T	7	100
AT1G05160.1	AT1G05160	1402	A	G	6	100
AT1G05160.1	AT1G05160	1483	T	C	10	100
AT1G05160.1	AT1G05160	1609	C	T	16	100
AT1G05160.1	AT1G05160	1663	G	A	19	100
AT1G05160.1	AT1G05160	1675	G	C	25	100
AT1G05160.1	AT1G05160	1687	G	A	23	100
AT1G05160.1	AT1G05160	1771	T	C	17	100
AT1G05160.1	AT1G05160	1851	G	T	15	100
AT1G05160.1	AT1G05160	1854	A	G	15	100
AT1G05160.1	AT1G05160	1861	C	T	13	100
AT1G05160.1	AT1G05160	1880	A	G	16	100
AT1G05160.1	AT1G05160	1914	T	G	8	100
AT1G05160.1	AT1G05160	1985	G	A	10	100
AT1G05160.1	AT1G05160	2019	G	C	13	100
AT1G05170.1	AT1G05170	476	C	G	6	100
AT1G05170.1	AT1G05170	664	A	G	8	100
AT1G05170.1	AT1G05170	692	G	A	6	100
AT1G05170.1	AT1G05170	709	A	G	6	100
AT1G05170.1	AT1G05170	819	C	T	13	100
AT1G05170.1	AT1G05170	1099	C	A	10	100
AT1G05170.1	AT1G05170	1460	C	A	12	100
AT1G05170.1	AT1G05170	1523	C	A	11	100
AT1G05170.1	AT1G05170	1551	G	A	7	100
AT1G05170.1	AT1G05170	1585	A	G	19	100
AT1G05170.1	AT1G05170	1586	C	A	19	100
AT1G05170.1	AT1G05170	1787	T	A	18	100
AT1G05170.2	AT1G05170	377	G	A	9	100
AT1G05170.2	AT1G05170	407	C	T	6	100
AT1G05170.2	AT1G05170	673	A	G	6	100
AT1G05170.2	AT1G05170	828	C	T	9	100
AT1G05170.2	AT1G05170	1108	C	A	6	100
AT1G05170.2	AT1G05170	1469	C	A	19	100
AT1G05170.2	AT1G05170	1532	C	A	9	100
AT1G05170.2	AT1G05170	1594	A	G	10	100
AT1G05170.2	AT1G05170	1595	C	A	10	100
AT1G05170.2	AT1G05170	1796	T	A	9	100
AT1G05190.1	AT1G05190	87	T	C	20	100
AT1G05190.1	AT1G05190	389	C	T	72	100
AT1G05190.1	AT1G05190	440	T	C	85	100
AT1G05200.1	AT1G05200	192	G	T	7	100
AT1G05200.1	AT1G05200	199	T	C	8	100
AT1G05200.1	AT1G05200	434	T	C	5	100
AT1G05200.1	AT1G05200	566	C	A	5	100
AT1G05200.1	AT1G05200	1028	T	C	12	100
AT1G05200.1	AT1G05200	1241	T	C	5	100
AT1G05200.1	AT1G05200	1259	T	C	7	100
AT1G05200.1	AT1G05200	1265	T	C	7	100
AT1G05200.1	AT1G05200	1442	T	C	7	100
AT1G05200.1	AT1G05200	1457	T	C	6	100
AT1G05200.2	AT1G05200	240	G	T	5	100
AT1G05200.2	AT1G05200	247	T	C	5	100
AT1G05200.2	AT1G05200	524	A	G	5	100
AT1G05200.2	AT1G05200	914	T	A	9	100
AT1G05200.2	AT1G05200	917	C	T	9	100
AT1G05200.2	AT1G05200	956	G	A	6	100
AT1G05200.2	AT1G05200	1289	T	C	7	100
AT1G05200.2	AT1G05200	1307	T	C	6	100
AT1G05200.2	AT1G05200	1313	T	C	6	100
AT1G05200.2	AT1G05200	1433	A	T	7	100
AT1G05200.2	AT1G05200	1490	T	C	6	100
AT1G05200.2	AT1G05200	1505	T	C	7	100
AT1G05220.1	AT1G05220	493	G	C	9	100
AT1G05230.1	AT1G05230	1453	C	G	11	100
AT1G05230.1	AT1G05230	2294	C	G	38	100
AT1G05230.1	AT1G05230	2329	A	G	36	100
AT1G05230.2	AT1G05230	1662	C	G	13	100
AT1G05230.2	AT1G05230	2503	C	G	45	100
AT1G05230.2	AT1G05230	2538	A	G	33	100
AT1G05230.3	AT1G05230	1453	C	G	12	100
AT1G05230.3	AT1G05230	2288	C	G	39	100
AT1G05230.3	AT1G05230	2323	A	G	37	100
AT1G05230.4	AT1G05230	1748	C	G	16	100
AT1G05230.4	AT1G05230	2589	C	G	40	100
AT1G05230.4	AT1G05230	2624	A	G	33	100
AT1G05260.1	AT1G05260	114	T	G	82	98.78
AT1G05260.1	AT1G05260	684	T	C	85	100
AT1G05260.1	AT1G05260	1068	G	C	97	100
AT1G05270.1	AT1G05270	483	A	G	73	98.63
AT1G05270.1	AT1G05270	570	A	T	74	100
AT1G05270.1	AT1G05270	1355	T	C	22	100
AT1G05280.1	AT1G05280	356	T	A	50	98
AT1G05280.1	AT1G05280	1003	G	T	46	100
AT1G05280.1	AT1G05280	1072	C	G	56	100
AT1G05280.1	AT1G05280	1323	T	C	65	100
AT1G05300.1	AT1G05300	933	A	G	12	100
AT1G05300.1	AT1G05300	956	C	A	9	100
AT1G05320.1	AT1G05320	146	C	G	6	100
AT1G05320.1	AT1G05320	194	C	T	7	100
AT1G05320.1	AT1G05320	1050	G	T	6	100
AT1G05320.1	AT1G05320	1077	G	A	8	100
AT1G05320.1	AT1G05320	1257	A	G	14	100
AT1G05320.1	AT1G05320	1293	G	A	12	100
AT1G05320.1	AT1G05320	1449	C	G	23	100
AT1G05320.1	AT1G05320	2259	A	G	25	100
AT1G05320.1	AT1G05320	2305	A	G	31	96.77
AT1G05320.1	AT1G05320	2339	C	T	27	100
AT1G05320.1	AT1G05320	2436	G	A	23	100
AT1G05320.1	AT1G05320	2581	A	T	5	100
AT1G05320.2	AT1G05320	537	C	T	14	100
AT1G05320.2	AT1G05320	1046	G	T	11	100
AT1G05320.2	AT1G05320	1073	G	A	9	100
AT1G05320.2	AT1G05320	1253	A	G	10	100
AT1G05320.2	AT1G05320	1445	C	G	6	100
AT1G05320.2	AT1G05320	2255	A	G	19	100
AT1G05320.2	AT1G05320	2301	A	G	28	100
AT1G05320.2	AT1G05320	2335	C	T	27	100
AT1G05320.2	AT1G05320	2432	G	A	24	100
AT1G05320.3	AT1G05320	597	C	T	7	100
AT1G05320.3	AT1G05320	1106	G	T	9	100
AT1G05320.3	AT1G05320	1133	G	A	10	100
AT1G05320.3	AT1G05320	1313	A	G	12	100
AT1G05320.3	AT1G05320	1349	G	A	13	100
AT1G05320.3	AT1G05320	1505	C	G	13	100
AT1G05320.3	AT1G05320	2315	A	G	24	100
AT1G05320.3	AT1G05320	2361	A	G	31	100
AT1G05320.3	AT1G05320	2395	C	T	33	100
AT1G05320.3	AT1G05320	2492	G	A	24	100
AT1G05320.3	AT1G05320	2637	A	T	9	100
AT1G05340.1	AT1G05340	222	T	G	6	100
AT1G05350.1	AT1G05350	37	T	C	13	100
AT1G05350.1	AT1G05350	66	C	T	16	100
AT1G05350.1	AT1G05350	157	C	T	26	100
AT1G05350.1	AT1G05350	177	C	T	28	100
AT1G05350.1	AT1G05350	194	A	C	26	100
AT1G05350.1	AT1G05350	313	T	A	45	100
AT1G05350.1	AT1G05350	370	C	T	48	100
AT1G05350.1	AT1G05350	403	T	C	44	100
AT1G05350.1	AT1G05350	469	C	G	70	100
AT1G05350.1	AT1G05350	500	A	C	74	100
AT1G05350.1	AT1G05350	544	A	G	69	100
AT1G05350.1	AT1G05350	631	C	G	58	100
AT1G05350.1	AT1G05350	640	A	G	50	100
AT1G05350.1	AT1G05350	664	A	G	59	100
AT1G05350.1	AT1G05350	739	A	T	78	98.71
AT1G05350.1	AT1G05350	1102	T	C	59	100
AT1G05350.1	AT1G05350	1129	T	C	53	100
AT1G05350.1	AT1G05350	1273	A	G	76	100
AT1G05350.1	AT1G05350	1342	G	A	88	100
AT1G05350.1	AT1G05350	1369	C	T	80	100
AT1G05350.1	AT1G05350	1441	G	A	73	100
AT1G05350.1	AT1G05350	1499	T	A	53	98.11
AT1G05350.1	AT1G05350	1545	T	G	31	100
AT1G05350.1	AT1G05350	1566	T	C	18	100
AT1G05350.1	AT1G05350	1568	T	C	19	100
AT1G05350.1	AT1G05350	1608	G	A	6	100
AT1G05360.1	AT1G05360	113	T	C	15	100
AT1G05360.1	AT1G05360	115	T	A	14	100
AT1G05360.1	AT1G05360	186	G	C	16	100
AT1G05360.1	AT1G05360	464	G	C	60	98.33
AT1G05360.1	AT1G05360	473	C	T	62	100
AT1G05360.1	AT1G05360	619	T	C	54	100
AT1G05360.1	AT1G05360	647	G	A	48	100
AT1G05360.1	AT1G05360	654	A	G	49	100
AT1G05360.1	AT1G05360	761	A	G	25	100
AT1G05360.1	AT1G05360	764	A	T	26	100
AT1G05360.1	AT1G05360	788	A	C	33	100
AT1G05360.1	AT1G05360	947	G	A	45	100
AT1G05360.1	AT1G05360	959	T	C	47	97.87
AT1G05360.1	AT1G05360	1001	C	T	51	100
AT1G05360.1	AT1G05360	1190	G	T	51	100
AT1G05360.1	AT1G05360	1226	G	A	65	100
AT1G05360.1	AT1G05360	1403	G	A	75	100
AT1G05360.1	AT1G05360	1450	C	G	64	100
AT1G05360.1	AT1G05360	1529	T	A	42	100
AT1G05360.1	AT1G05360	1544	G	T	30	100
AT1G05360.1	AT1G05360	1553	G	T	26	100
AT1G05360.1	AT1G05360	1567	T	A	25	100
AT1G05360.1	AT1G05360	1586	A	C	25	100
AT1G05360.1	AT1G05360	1626	A	T	11	100
AT1G05380.1	AT1G05380	2170	T	A	13	100
AT1G05380.1	AT1G05380	2557	C	T	13	100
AT1G05380.1	AT1G05380	2660	G	A	5	100
AT1G05380.1	AT1G05380	3107	G	A	20	100
AT1G05380.1	AT1G05380	3274	C	T	27	100
AT1G05380.2	AT1G05380	2191	T	A	10	100
AT1G05380.2	AT1G05380	2578	C	T	9	100
AT1G05380.2	AT1G05380	2681	G	A	10	100
AT1G05380.2	AT1G05380	3128	G	A	24	100
AT1G05380.2	AT1G05380	3295	C	T	31	100
AT1G05410.1	AT1G05410	482	C	A	14	100
AT1G05410.1	AT1G05410	496	G	T	13	100
AT1G05410.1	AT1G05410	863	A	G	14	100
AT1G05410.1	AT1G05410	965	T	G	16	100
AT1G05410.1	AT1G05410	1476	A	C	28	100
AT1G05410.1	AT1G05410	1596	A	G	18	100
AT1G05410.2	AT1G05410	163	T	C	5	100
AT1G05410.2	AT1G05410	397	C	A	15	100
AT1G05410.2	AT1G05410	411	G	T	10	100
AT1G05410.2	AT1G05410	778	A	G	15	100
AT1G05410.2	AT1G05410	880	T	G	18	100
AT1G05410.2	AT1G05410	1391	A	C	32	100
AT1G05410.2	AT1G05410	1511	A	G	18	100
AT1G05430.1	AT1G05430	80	A	G	8	100
AT1G05430.1	AT1G05430	126	A	C	6	100
AT1G05430.1	AT1G05430	216	T	C	17	100
AT1G05430.1	AT1G05430	243	T	A	14	100
AT1G05430.1	AT1G05430	316	T	A	27	100
AT1G05430.1	AT1G05430	483	C	T	40	100
AT1G05430.1	AT1G05430	561	T	A	66	100
AT1G05430.1	AT1G05430	564	C	A	67	100
AT1G05430.1	AT1G05430	605	A	T	52	100
AT1G05430.1	AT1G05430	639	A	C	67	100
AT1G05430.1	AT1G05430	646	G	A	71	100
AT1G05430.1	AT1G05430	717	G	A	58	100
AT1G05430.1	AT1G05430	975	C	T	7	100
AT1G05460.1	AT1G05460	1142	A	T	8	100
AT1G05460.1	AT1G05460	1762	C	G	31	100
AT1G05460.1	AT1G05460	2095	C	G	29	100
AT1G05460.1	AT1G05460	2476	G	A	43	100
AT1G05460.1	AT1G05460	2944	C	T	71	100
AT1G05460.1	AT1G05460	3129	C	G	60	100
AT1G05490.1	AT1G05490	1143	G	A	94	100
AT1G05490.1	AT1G05490	1167	T	C	89	100
AT1G05490.1	AT1G05490	2082	C	G	67	100
AT1G05490.1	AT1G05490	2201	T	C	44	100
AT1G05490.1	AT1G05490	2307	C	T	49	100
AT1G05490.1	AT1G05490	2964	G	A	69	100
AT1G05520.1	AT1G05520	236	C	A	32	100
AT1G05520.1	AT1G05520	2437	A	G	79	100
AT1G05540.1	AT1G05540	1092	C	T	69	100
AT1G05570.1	AT1G05570	2216	T	A	5	100
AT1G05570.1	AT1G05570	6051	G	A	34	100
AT1G05570.1	AT1G05570	6181	T	A	17	100
AT1G05570.2	AT1G05570	5928	G	A	32	100
AT1G05570.2	AT1G05570	6058	T	A	10	100
AT1G05590.1	AT1G05590	219	T	C	23	100
AT1G05590.1	AT1G05590	426	T	C	35	100
AT1G05590.1	AT1G05590	2072	C	T	38	100
AT1G05600.1	AT1G05600	257	G	A	5	100
AT1G05600.2	AT1G05600	283	G	A	8	100
AT1G05630.2	AT1G05630	3154	T	A	10	100
AT1G05690.1	AT1G05690	274	A	T	5	100
AT1G05690.1	AT1G05690	345	G	C	9	100
AT1G05690.1	AT1G05690	629	T	A	7	100
AT1G05690.1	AT1G05690	641	A	T	5	100
AT1G05690.1	AT1G05690	1428	T	C	14	100
AT1G05710.1	AT1G05710	151	T	A	5	100
AT1G05710.1	AT1G05710	172	A	G	5	100
AT1G05710.1	AT1G05710	189	A	G	6	100
AT1G05710.1	AT1G05710	248	T	C	14	100
AT1G05710.1	AT1G05710	280	G	A	19	100
AT1G05710.1	AT1G05710	752	A	T	12	100
AT1G05710.1	AT1G05710	785	C	T	18	100
AT1G05710.1	AT1G05710	839	A	G	9	100
AT1G05710.2	AT1G05710	450	A	G	19	100
AT1G05710.2	AT1G05710	476	T	C	19	100
AT1G05710.2	AT1G05710	509	T	C	15	100
AT1G05710.2	AT1G05710	541	G	A	13	100
AT1G05710.2	AT1G05710	774	G	A	6	100
AT1G05710.2	AT1G05710	1079	A	T	8	100
AT1G05710.2	AT1G05710	1112	C	T	11	100
AT1G05710.3	AT1G05710	450	A	G	16	100
AT1G05710.3	AT1G05710	509	T	C	12	100
AT1G05710.3	AT1G05710	541	G	A	13	100
AT1G05710.3	AT1G05710	708	G	A	17	100
AT1G05710.3	AT1G05710	1013	A	T	7	100
AT1G05710.3	AT1G05710	1046	C	T	10	100
AT1G05710.3	AT1G05710	1100	A	G	6	100
AT1G05710.4	AT1G05710	104	T	C	9	100
AT1G05710.4	AT1G05710	137	T	C	7	100
AT1G05710.4	AT1G05710	169	G	A	6	100
AT1G05710.4	AT1G05710	336	G	A	9	100
AT1G05710.4	AT1G05710	641	A	T	8	100
AT1G05710.4	AT1G05710	674	C	T	7	100
AT1G05710.4	AT1G05710	728	A	G	6	100
AT1G05710.5	AT1G05710	194	T	G	6	100
AT1G05710.5	AT1G05710	515	T	C	9	100
AT1G05710.5	AT1G05710	548	T	C	12	100
AT1G05710.5	AT1G05710	580	G	A	20	100
AT1G05710.5	AT1G05710	747	G	A	18	100
AT1G05710.5	AT1G05710	1052	A	T	8	100
AT1G05710.5	AT1G05710	1085	C	T	9	100
AT1G05720.1	AT1G05720	66	A	G	7	100
AT1G05720.1	AT1G05720	91	G	A	20	100
AT1G05720.1	AT1G05720	93	T	A	21	100
AT1G05720.1	AT1G05720	117	A	G	44	100
AT1G05720.1	AT1G05720	192	A	T	91	100
AT1G05720.1	AT1G05720	664	G	C	64	100
AT1G05720.1	AT1G05720	764	A	G	12	100
AT1G05730.1	AT1G05730	164	T	A	29	100
AT1G05730.1	AT1G05730	239	T	C	28	100
AT1G05730.1	AT1G05730	263	A	T	20	100
AT1G05730.1	AT1G05730	265	C	T	18	100
AT1G05730.1	AT1G05730	290	T	C	8	100
AT1G05730.1	AT1G05730	890	G	T	36	100
AT1G05730.1	AT1G05730	994	G	A	38	100
AT1G05730.1	AT1G05730	1078	G	C	17	100
AT1G05730.1	AT1G05730	1090	A	T	14	100
AT1G05750.1	AT1G05750	575	A	C	6	100
AT1G05750.1	AT1G05750	602	A	G	6	100
AT1G05750.1	AT1G05750	956	T	A	5	100
AT1G05750.1	AT1G05750	1007	A	G	6	100
AT1G05750.1	AT1G05750	1017	T	A	6	100
AT1G05750.1	AT1G05750	1730	T	G	10	100
AT1G05750.1	AT1G05750	1805	G	A	8	100
AT1G05750.1	AT1G05750	2019	A	G	7	100
AT1G05780.1	AT1G05780	394	G	A	39	100
AT1G05785.1	AT1G05785	670	G	T	9	100
AT1G05785.1	AT1G05785	693	T	A	5	100
AT1G05785.2	AT1G05785	657	G	T	11	100
AT1G05785.2	AT1G05785	680	T	A	10	100
AT1G05790.1	AT1G05790	1697	G	A	17	100
AT1G05790.2	AT1G05790	1986	G	A	14	100
AT1G05805.1	AT1G05805	1138	G	A	10	100
AT1G05805.1	AT1G05805	1336	T	A	7	100
AT1G05820.1	AT1G05820	978	A	T	5	100
AT1G05820.2	AT1G05820	1794	C	A	6	100
AT1G05820.2	AT1G05820	1883	A	C	15	100
AT1G05830.1	AT1G05830	2238	T	G	6	100
AT1G05830.1	AT1G05830	2480	A	T	5	100
AT1G05830.1	AT1G05830	2644	C	T	5	100
AT1G05830.1	AT1G05830	3505	T	A	15	100
AT1G05830.1	AT1G05830	3724	C	G	15	100
AT1G05830.1	AT1G05830	3757	A	G	10	100
AT1G05830.2	AT1G05830	736	C	T	5	100
AT1G05830.2	AT1G05830	2423	C	T	9	100
AT1G05830.2	AT1G05830	2480	A	T	8	100
AT1G05830.2	AT1G05830	2644	C	T	8	100
AT1G05830.2	AT1G05830	3716	C	G	11	100
AT1G05830.2	AT1G05830	3749	A	G	9	100
AT1G05840.1	AT1G05840	1539	A	C	45	100
AT1G05850.1	AT1G05850	231	G	A	87	98.85
AT1G05850.1	AT1G05850	848	T	A	81	100
AT1G05850.1	AT1G05850	908	A	G	77	100
AT1G05860.1	AT1G05860	464	T	C	30	100
AT1G05890.1	AT1G05890	787	C	A	6	100
AT1G05890.2	AT1G05890	1014	C	A	9	100
AT1G05910.1	AT1G05910	2695	C	T	36	100
AT1G05940.1	AT1G05940	634	T	G	24	100
AT1G05960.1	AT1G05960	1873	G	C	10	100
AT1G05960.1	AT1G05960	3504	G	T	15	100
AT1G05960.2	AT1G05960	1927	G	C	9	100
AT1G05960.2	AT1G05960	3558	G	T	15	100
AT1G05970.1	AT1G05970	121	G	A	8	100
AT1G05970.2	AT1G05970	121	G	A	12	100
AT1G06010.1	AT1G06010	28	T	C	7	100
AT1G06010.1	AT1G06010	93	T	C	25	100
AT1G06010.1	AT1G06010	210	A	G	77	100
AT1G06010.1	AT1G06010	229	A	G	65	100
AT1G06010.1	AT1G06010	328	G	T	92	100
AT1G06010.1	AT1G06010	446	G	T	57	100
AT1G06010.1	AT1G06010	502	C	T	30	100
AT1G06010.1	AT1G06010	518	G	C	23	100
AT1G06010.1	AT1G06010	598	C	T	6	100
AT1G06030.1	AT1G06030	212	G	A	5	100
AT1G06030.1	AT1G06030	480	G	A	11	100
AT1G06050.1	AT1G06050	1237	G	C	9	100
AT1G06070.1	AT1G06070	1766	C	T	34	100
AT1G06110.1	AT1G06110	1135	T	A	62	100
AT1G06110.1	AT1G06110	1183	A	G	60	100
AT1G06110.1	AT1G06110	1278	G	A	59	100
AT1G06130.1	AT1G06130	1245	C	G	24	100
AT1G06130.2	AT1G06130	1210	C	G	34	100
AT1G06149.1	AT1G06149	2543	C	T	8	100
AT1G06149.1	AT1G06149	2834	A	G	10	100
AT1G06150.1	AT1G06150	2543	C	T	5	100
AT1G06150.1	AT1G06150	3710	T	G	15	100
AT1G06150.1	AT1G06150	4177	T	A	13	100
AT1G06150.2	AT1G06150	2543	C	T	8	100
AT1G06150.2	AT1G06150	2834	A	G	6	100
AT1G06190.1	AT1G06190	352	A	G	15	100
AT1G06190.1	AT1G06190	541	T	C	24	100
AT1G06190.1	AT1G06190	1048	T	A	52	100
AT1G06190.1	AT1G06190	1061	C	G	59	100
AT1G06190.2	AT1G06190	352	A	G	10	100
AT1G06190.2	AT1G06190	541	T	C	25	100
AT1G06200.1	AT1G06200	359	G	C	81	100
AT1G06200.1	AT1G06200	644	C	T	77	100
AT1G06200.1	AT1G06200	872	G	A	37	100
AT1G06200.1	AT1G06200	905	C	T	13	100
AT1G06220.1	AT1G06220	1326	C	T	8	100
AT1G06220.1	AT1G06220	1482	A	G	30	100
AT1G06220.1	AT1G06220	1560	C	T	24	100
AT1G06220.2	AT1G06220	1615	A	G	30	100
AT1G06220.2	AT1G06220	1693	C	T	30	100
AT1G06230.1	AT1G06230	895	T	C	16	100
AT1G06230.1	AT1G06230	2008	A	T	14	100
AT1G06230.1	AT1G06230	2976	C	T	45	100
AT1G06230.2	AT1G06230	842	T	C	8	100
AT1G06230.2	AT1G06230	1955	A	T	10	100
AT1G06230.2	AT1G06230	2923	C	T	46	100
AT1G06230.3	AT1G06230	867	T	C	14	100
AT1G06230.3	AT1G06230	1980	A	T	7	100
AT1G06230.3	AT1G06230	2948	C	T	43	100
AT1G06240.1	AT1G06240	701	A	G	30	100
AT1G06270.1	AT1G06270	263	C	T	9	100
AT1G06270.1	AT1G06270	1088	C	G	22	100
AT1G06270.1	AT1G06270	1229	G	A	12	100
AT1G06270.1	AT1G06270	1346	G	C	16	100
AT1G06290.1	AT1G06290	865	G	A	35	100
AT1G06290.1	AT1G06290	1358	C	T	72	100
AT1G06290.1	AT1G06290	1394	A	G	72	100
AT1G06290.1	AT1G06290	1514	G	C	81	98.76
AT1G06290.1	AT1G06290	1564	G	A	87	98.85
AT1G06290.1	AT1G06290	1690	A	G	41	100
AT1G06290.1	AT1G06290	1739	A	G	59	98.3
AT1G06290.1	AT1G06290	1745	T	G	62	98.38
AT1G06290.1	AT1G06290	1862	G	A	70	97.14
AT1G06290.1	AT1G06290	2162	A	T	12	100
AT1G06290.1	AT1G06290	2191	G	T	9	100
AT1G06290.1	AT1G06290	2210	T	C	12	100
AT1G06310.1	AT1G06310	2043	C	T	7	100
AT1G06380.1	AT1G06380	135	A	G	21	100
AT1G06380.1	AT1G06380	138	C	T	22	100
AT1G06380.1	AT1G06380	372	C	T	41	100
AT1G06380.1	AT1G06380	561	A	G	41	100
AT1G06380.1	AT1G06380	630	C	A	53	100
AT1G06390.1	AT1G06390	122	T	C	11	100
AT1G06390.1	AT1G06390	588	G	A	29	100
AT1G06390.1	AT1G06390	795	G	C	39	100
AT1G06390.1	AT1G06390	870	G	T	26	100
AT1G06390.1	AT1G06390	1477	G	T	42	100
AT1G06390.2	AT1G06390	108	T	C	10	100
AT1G06390.2	AT1G06390	574	G	A	40	100
AT1G06390.2	AT1G06390	781	G	C	35	100
AT1G06390.2	AT1G06390	856	G	T	24	100
AT1G06400.1	AT1G06400	95	A	G	28	100
AT1G06410.1	AT1G06410	1110	G	A	38	100
AT1G06410.1	AT1G06410	1944	T	C	55	100
AT1G06410.1	AT1G06410	2798	A	G	96	100
AT1G06420.1	AT1G06420	428	G	A	45	100
AT1G06420.2	AT1G06420	359	G	A	50	100
AT1G06430.1	AT1G06430	1415	C	T	37	100
AT1G06440.1	AT1G06440	698	G	C	5	100
AT1G06450.1	AT1G06450	594	G	C	41	100
AT1G06450.1	AT1G06450	1265	T	C	13	100
AT1G06450.1	AT1G06450	1281	T	G	8	100
AT1G06460.1	AT1G06460	1150	T	C	10	100
AT1G06460.1	AT1G06460	1193	A	C	6	100
AT1G06460.1	AT1G06460	1209	A	G	5	100
AT1G06470.1	AT1G06470	239	G	C	9	100
AT1G06470.1	AT1G06470	557	A	G	13	100
AT1G06470.2	AT1G06470	629	A	G	11	100
AT1G06500.1	AT1G06500	107	A	C	19	100
AT1G06500.1	AT1G06500	349	G	C	21	100
AT1G06500.1	AT1G06500	457	G	A	27	100
AT1G06500.2	AT1G06500	168	A	C	5	100
AT1G06500.2	AT1G06500	410	G	C	21	100
AT1G06500.2	AT1G06500	518	G	A	25	100
AT1G06500.3	AT1G06500	225	A	C	23	100
AT1G06500.3	AT1G06500	467	G	C	18	100
AT1G06500.3	AT1G06500	575	G	A	20	100
AT1G06500.4	AT1G06500	311	G	C	26	100
AT1G06500.4	AT1G06500	419	G	A	20	100
AT1G06510.1	AT1G06510	270	G	A	8	100
AT1G06515.1	AT1G06515	228	C	T	47	100
AT1G06515.2	AT1G06515	273	C	T	35	100
AT1G06520.1	AT1G06520	108	A	T	35	100
AT1G06520.1	AT1G06520	585	T	C	70	100
AT1G06520.1	AT1G06520	853	T	C	77	100
AT1G06520.1	AT1G06520	887	G	C	74	100
AT1G06520.1	AT1G06520	1723	G	A	88	100
AT1G06530.1	AT1G06530	258	C	A	68	100
AT1G06530.1	AT1G06530	343	T	C	82	100
AT1G06530.1	AT1G06530	417	C	T	65	100
AT1G06530.1	AT1G06530	566	G	C	78	100
AT1G06530.1	AT1G06530	775	G	A	86	100
AT1G06540.1	AT1G06540	48	G	A	8	100
AT1G06540.1	AT1G06540	72	T	A	9	100
AT1G06550.1	AT1G06550	172	T	A	59	100
AT1G06550.1	AT1G06550	1459	A	C	72	100
AT1G06560.1	AT1G06560	222	T	G	6	100
AT1G06560.1	AT1G06560	369	A	T	5	100
AT1G06560.1	AT1G06560	498	T	C	5	100
AT1G06560.1	AT1G06560	930	A	C	10	100
AT1G06560.1	AT1G06560	1498	G	A	6	100
AT1G06580.1	AT1G06580	743	A	G	8	100
AT1G06580.1	AT1G06580	975	A	C	6	100
AT1G06580.1	AT1G06580	996	T	A	6	100
AT1G06580.1	AT1G06580	1055	T	A	6	100
AT1G06580.1	AT1G06580	1669	A	T	6	100
AT1G06580.1	AT1G06580	1821	C	T	7	100
AT1G06590.1	AT1G06590	832	G	C	5	100
AT1G06590.1	AT1G06590	923	A	T	6	100
AT1G06590.1	AT1G06590	1492	T	C	6	100
AT1G06590.1	AT1G06590	2794	C	G	15	100
AT1G06590.1	AT1G06590	2810	T	C	16	100
AT1G06590.1	AT1G06590	2984	G	T	8	100
AT1G06630.1	AT1G06630	434	G	A	15	100
AT1G06630.1	AT1G06630	715	A	G	13	100
AT1G06630.2	AT1G06630	434	G	A	17	100
AT1G06630.2	AT1G06630	715	A	G	12	100
AT1G06630.3	AT1G06630	715	A	G	20	100
AT1G06650.1	AT1G06650	226	C	A	6	100
AT1G06650.1	AT1G06650	947	C	T	8	100
AT1G06650.2	AT1G06650	1018	C	T	9	100
AT1G06660.1	AT1G06660	1569	T	A	21	100
AT1G06670.1	AT1G06670	437	G	C	5	100
AT1G06670.1	AT1G06670	631	A	G	5	100
AT1G06670.1	AT1G06670	938	C	T	11	100
AT1G06670.1	AT1G06670	1187	C	T	7	100
AT1G06670.1	AT1G06670	1393	G	A	7	100
AT1G06670.1	AT1G06670	1415	A	G	9	100
AT1G06670.1	AT1G06670	1552	C	A	6	100
AT1G06670.1	AT1G06670	1623	G	T	16	100
AT1G06670.1	AT1G06670	1752	C	G	8	100
AT1G06670.1	AT1G06670	2019	C	T	12	100
AT1G06670.1	AT1G06670	2201	C	T	13	100
AT1G06670.1	AT1G06670	2267	G	A	11	100
AT1G06670.1	AT1G06670	3131	T	C	9	100
AT1G06670.1	AT1G06670	3213	A	G	11	100
AT1G06670.1	AT1G06670	3246	G	A	13	100
AT1G06670.1	AT1G06670	3854	A	G	28	100
AT1G06670.1	AT1G06670	3987	A	G	48	100
AT1G06670.1	AT1G06670	4042	G	C	38	100
AT1G06670.1	AT1G06670	4099	T	A	46	100
AT1G06670.1	AT1G06670	4282	A	G	25	100
AT1G06670.1	AT1G06670	4355	T	A	30	100
AT1G06670.1	AT1G06670	4356	C	T	31	100
AT1G06670.1	AT1G06670	4387	G	A	37	97.29
AT1G06670.1	AT1G06670	4434	T	C	40	100
AT1G06670.1	AT1G06670	4793	C	T	63	100
AT1G06670.1	AT1G06670	4860	C	T	48	100
AT1G06670.1	AT1G06670	4916	G	A	27	100
AT1G06670.1	AT1G06670	5097	T	C	10	100
AT1G06680.1	AT1G06680	487	T	A	89	100
[truncated: 82,256 more rows]
