# Supplementary material for: Perturbation of Parentally Biased Gene Expression during Interspecific Hybridization
Source: PLOS journal article supplement (doi:10.1371/journal.pone.0117293), 2015-02-26
Supplement: S9 (10.1371/journal.pone.0117293.s009) [file journal.pone.0117293.s009]

**TABLE S4**

Expression analysis of imprinted genes in the literature

| <b>Tissue</b> <sup>a</sup> | <b>Imprinting Status</b> <sup>b</sup> | <b>Paternal Bias</b> | <b># of genes</b> | <b>Expressed Col-0 X Aa</b> <sup>c</sup> | <b>Expressed C24 X Aa</b> | <b>Expressed Col-0 X C24</b> | <b>Expressed C24 X Col-0</b> |
|----------------------------|---------------------------------------|----------------------|-------------------|------------------------------------------|---------------------------|------------------------------|------------------------------|
| Endosperm (65)             | Imprinted                             | PEG                  | 11                | 7                                        | 7                         | 9                            | 9                            |
|                            | Unknown                               | PEG                  | 54                | 51                                       | 49                        | 47                           | 52                           |

<sup>a</sup> Seed compartment for which expression pattern was observed.

<sup>b</sup> TAIR annotated imprinted genes expressed in parent-of-origin specific manner with known epigenetic processes that establish allele-specific silencing. “Unknown” genes referenced in literature as having paternally-biased expression.

<sup>c</sup> Expressed at coverage > 5 reads.

<sup>d</sup> Aa, *Arabidopsis arenosa*.
